# Supplementary material
Source: PubMed Central journal article supplement (PMC2860232)
Supplement: supp_M900350-MCP200_Supplementary_Data.pdf [file supp_M900350-MCP200_Supplementary_Data.pdf]

## Interpretation of MS<sup>3</sup> and MS<sup>4</sup> spectra acquired during top down analysis of CLR chains.

The nomenclature for fragment ions defined by Macek et al in [Mol Cell Proteomics. 5(5):949-958] was adopted.

We thus marked as  $\hat{y}$ , the fragment ions containing the C-terminal residue of the b-type fragment selected for MS<sup>3</sup> or MS<sup>4</sup>.

We marked as  $\hat{b}$ , the fragment ions containing the N-terminal residue of the y-type fragment selected for MS<sup>3</sup> or MS<sup>4</sup>.

We chose to label as 'y' the fragments whose mass matched the theoretical m/z of y-type fragment ions, even though they came from MS<sup>3</sup> or MS<sup>4</sup> fragmentation of b ions.

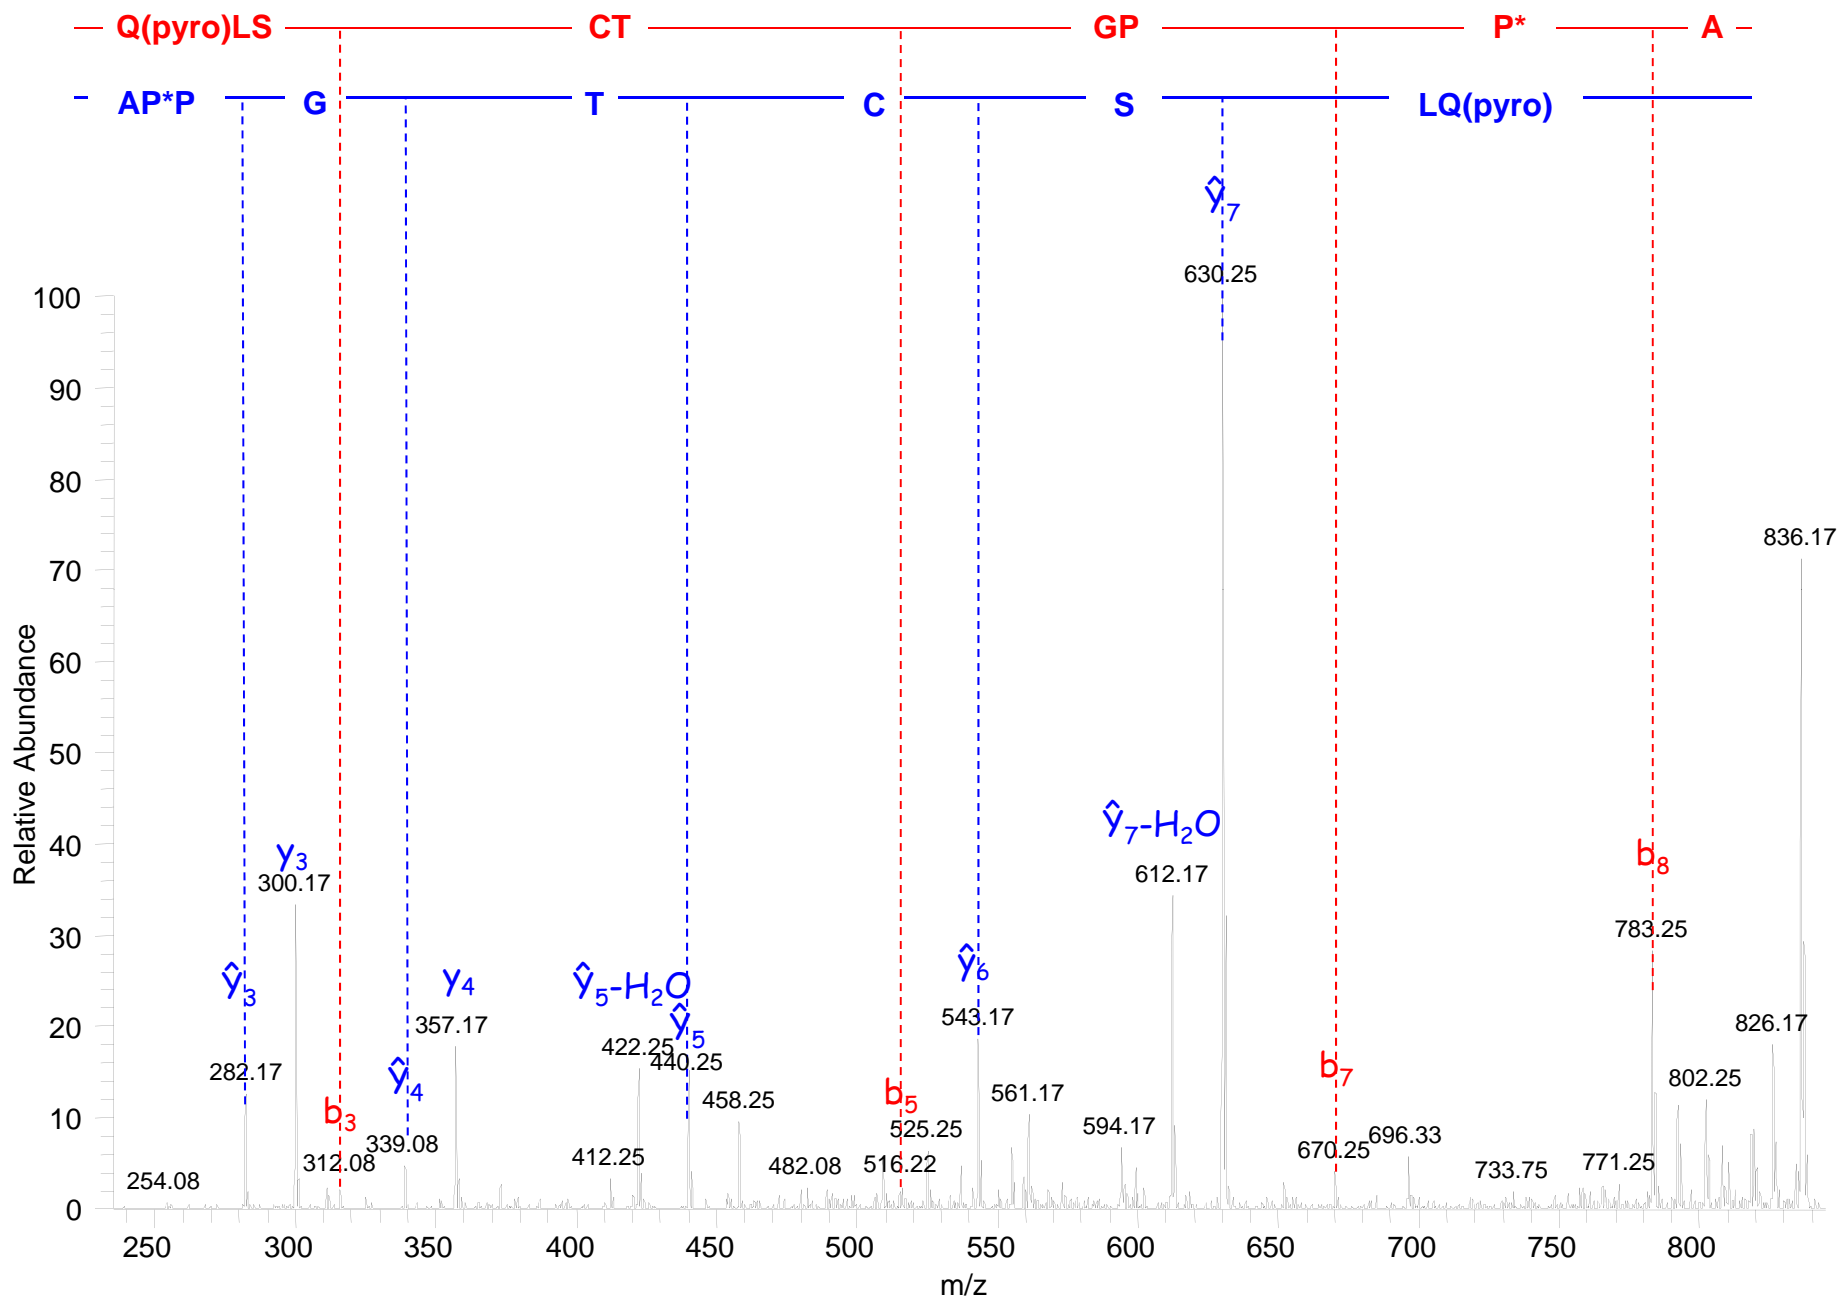

ITMS<sup>3</sup> of the  $b_9^+$  ion at m/z 854.3670 (1+), produced by FTMS<sup>2</sup> analysis of m/z 1102.41 (10+) or 1104.02 (10+) (CLR-B)

**Q(pyro)LSCTGPP\*A**

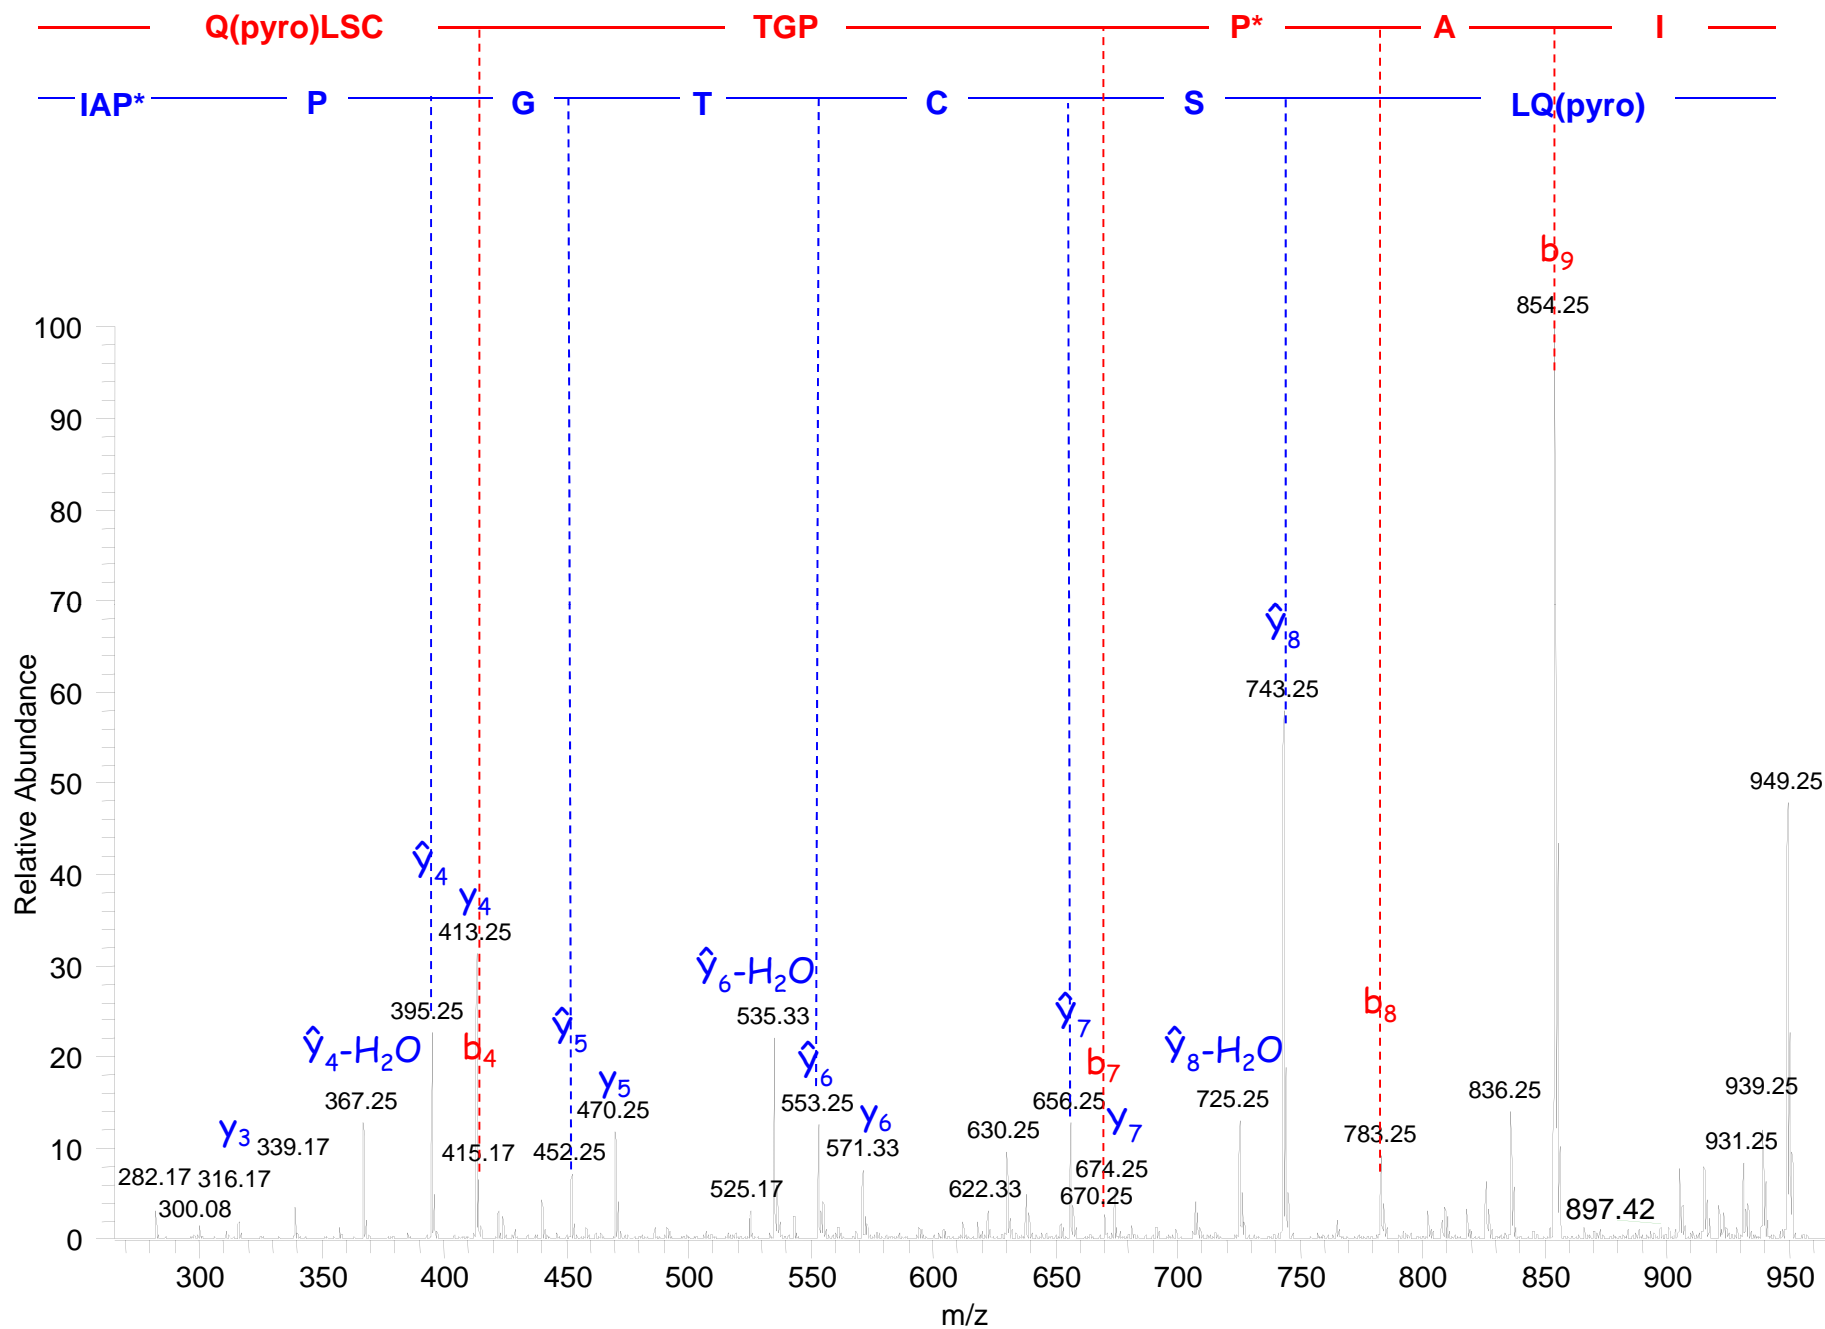

ITMS<sup>3</sup> of the  $b_{10}^+$  ion at m/z 967.4504 (1+), produced by FTMS<sup>2</sup> analysis of m/z 1102.41 (10+) or 1104.02 (10+) (CLR-B)  
**Q(pyro)LSCTGPP\*AI**

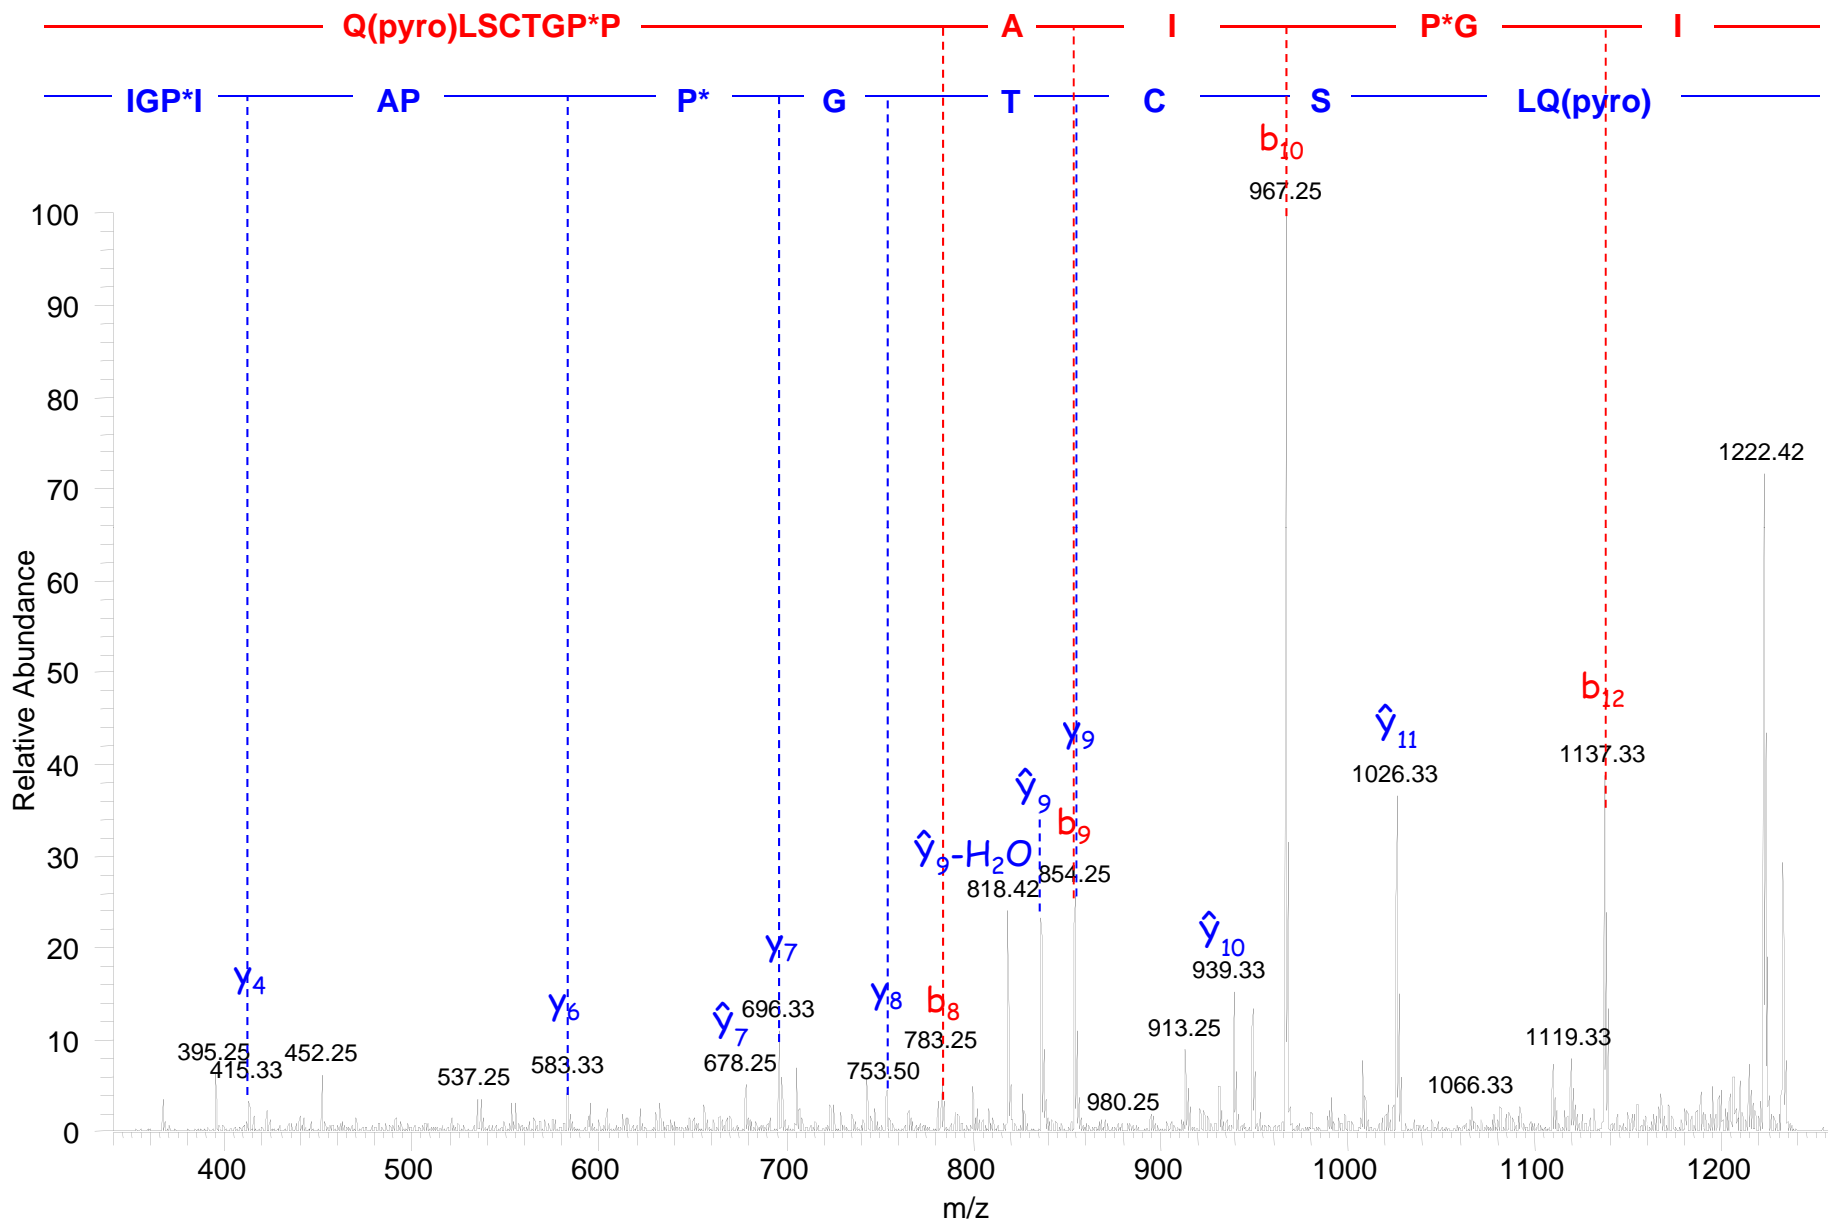

ITMS<sup>3</sup> of the  $b_{13}^+$  ion at m/z 1250.6014 (1+), produced by FTMS<sup>2</sup> analysis of m/z 1102.41 (10+) or 1104.02 (10+) (CLR-B)  
 Q(pyro)LSCTGP\*PAIP\*GI

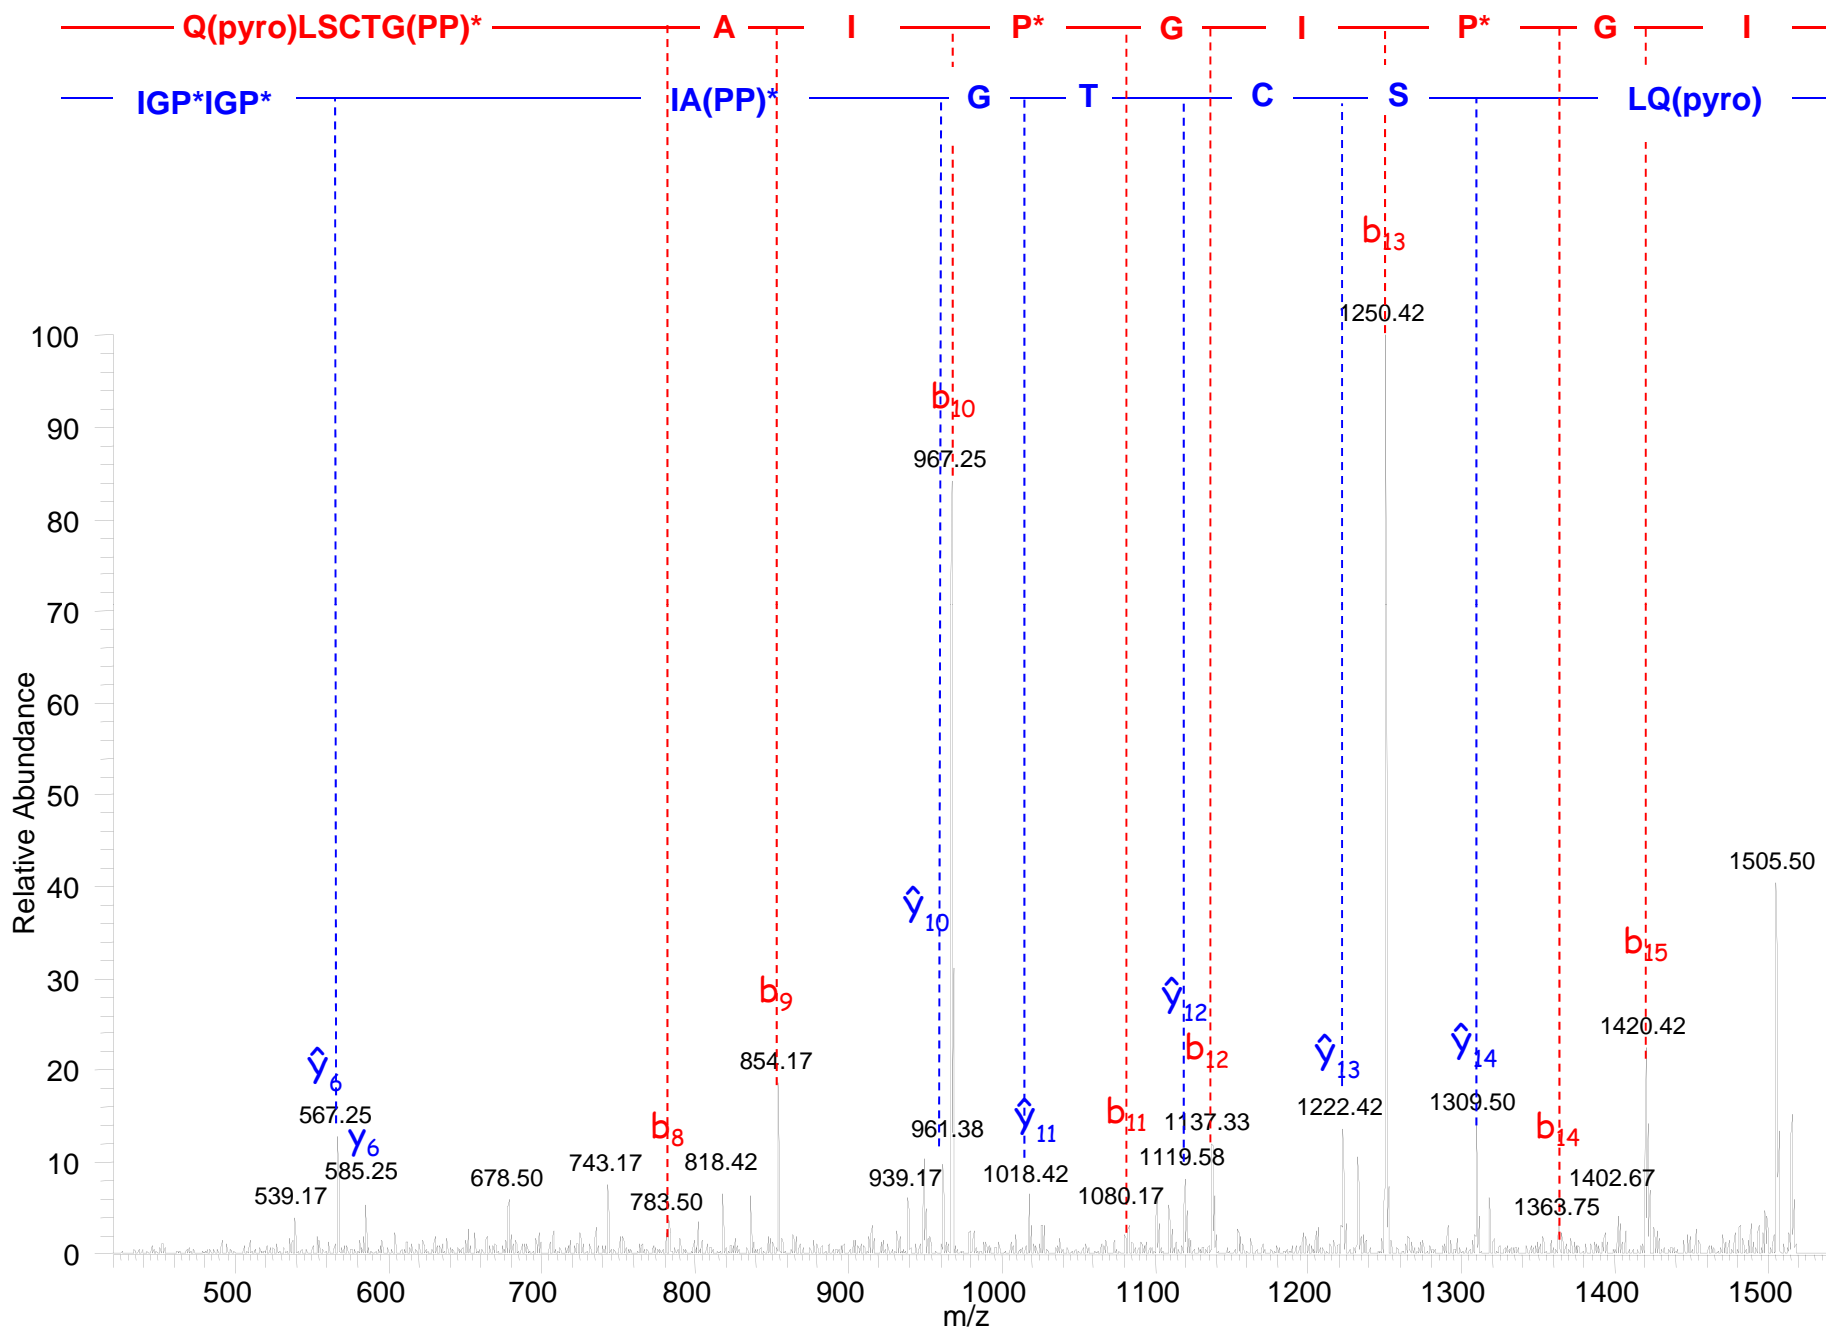

ITMS<sup>3</sup> of the b<sub>16</sub><sup>+</sup> ion at m/z 1533.7533 (1+), produced by FTMS<sup>2</sup> analysis of m/z 1102.41 (10+) or 1104.02 (10+) (CLR-B)  
 Q(pyro)LSCTG(PP)\*AIP\*GIP\*GI

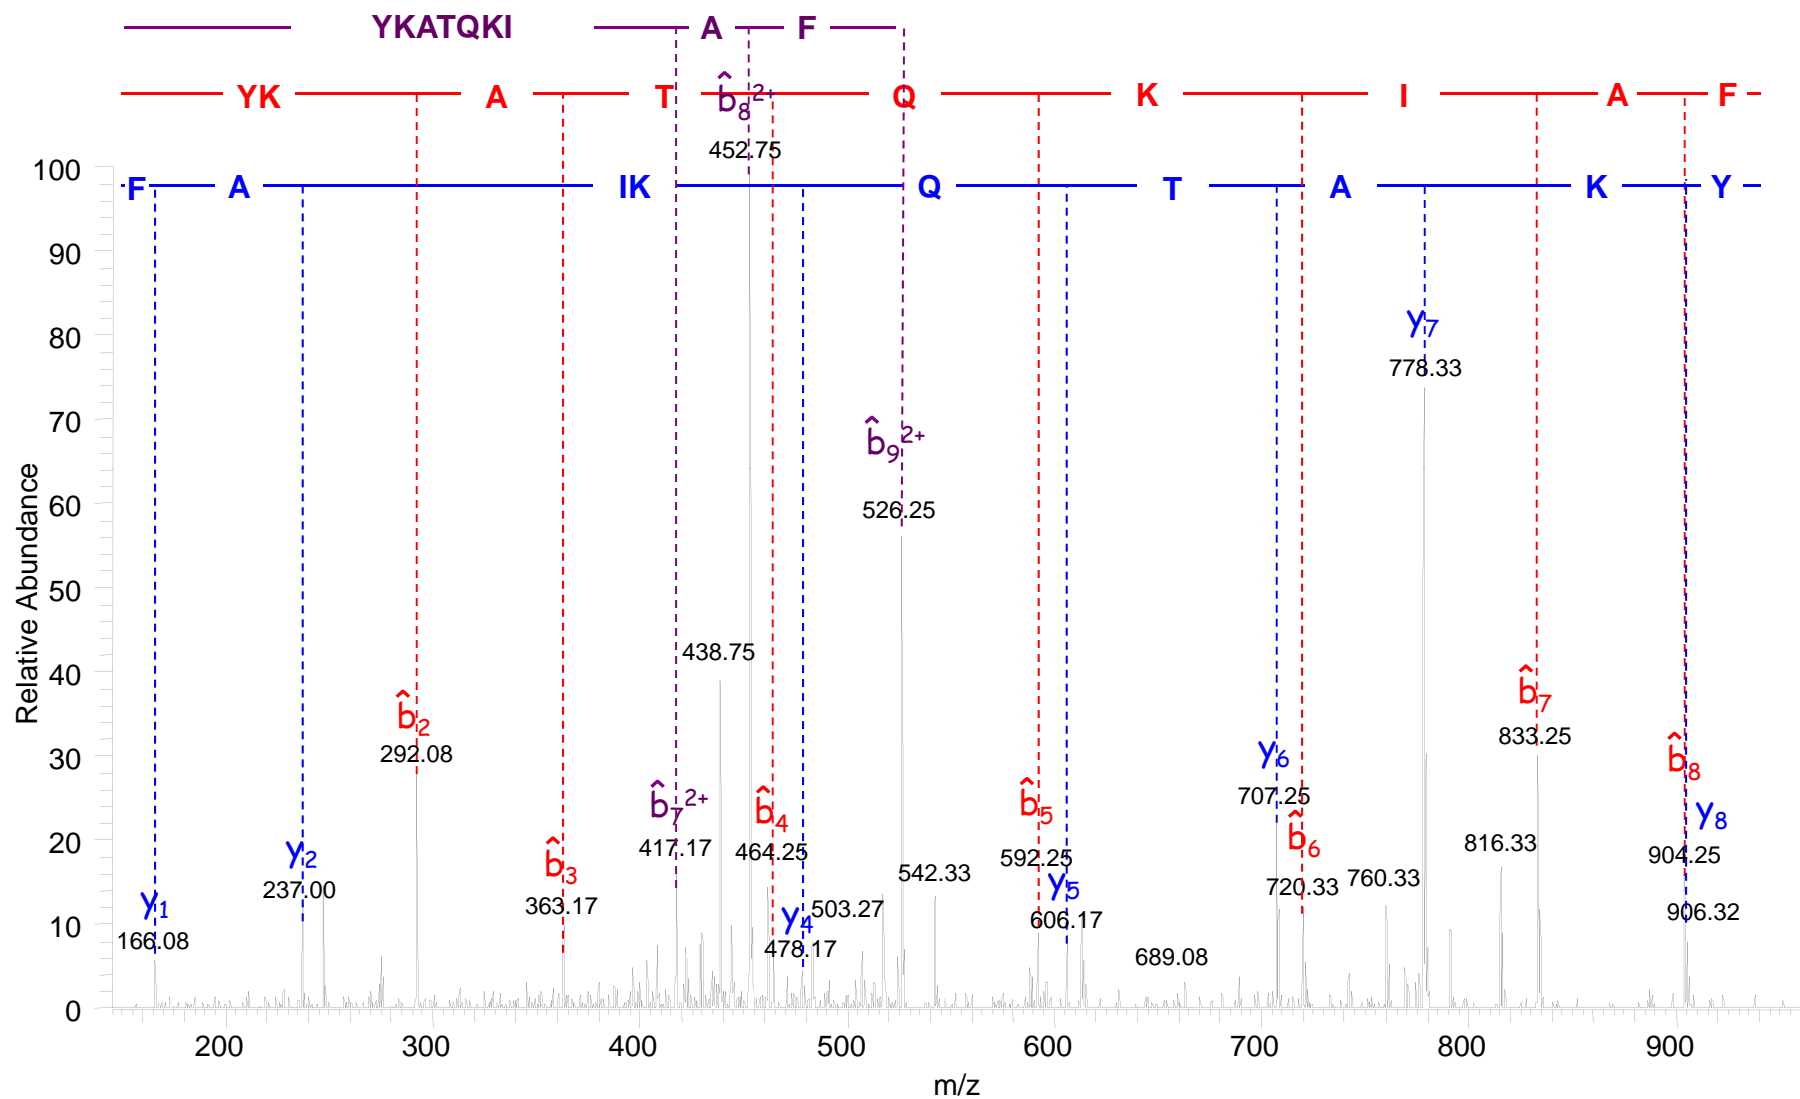

ITMS<sup>3</sup> of the  $y_9^{2+}$  ion at m/z 535.3027 (2+), produced by FTMS<sup>2</sup> analysis of m/z 1102.41 (10+) or 1104.02 (10+) (CLR-B, 1-97)

YKATQKIAF

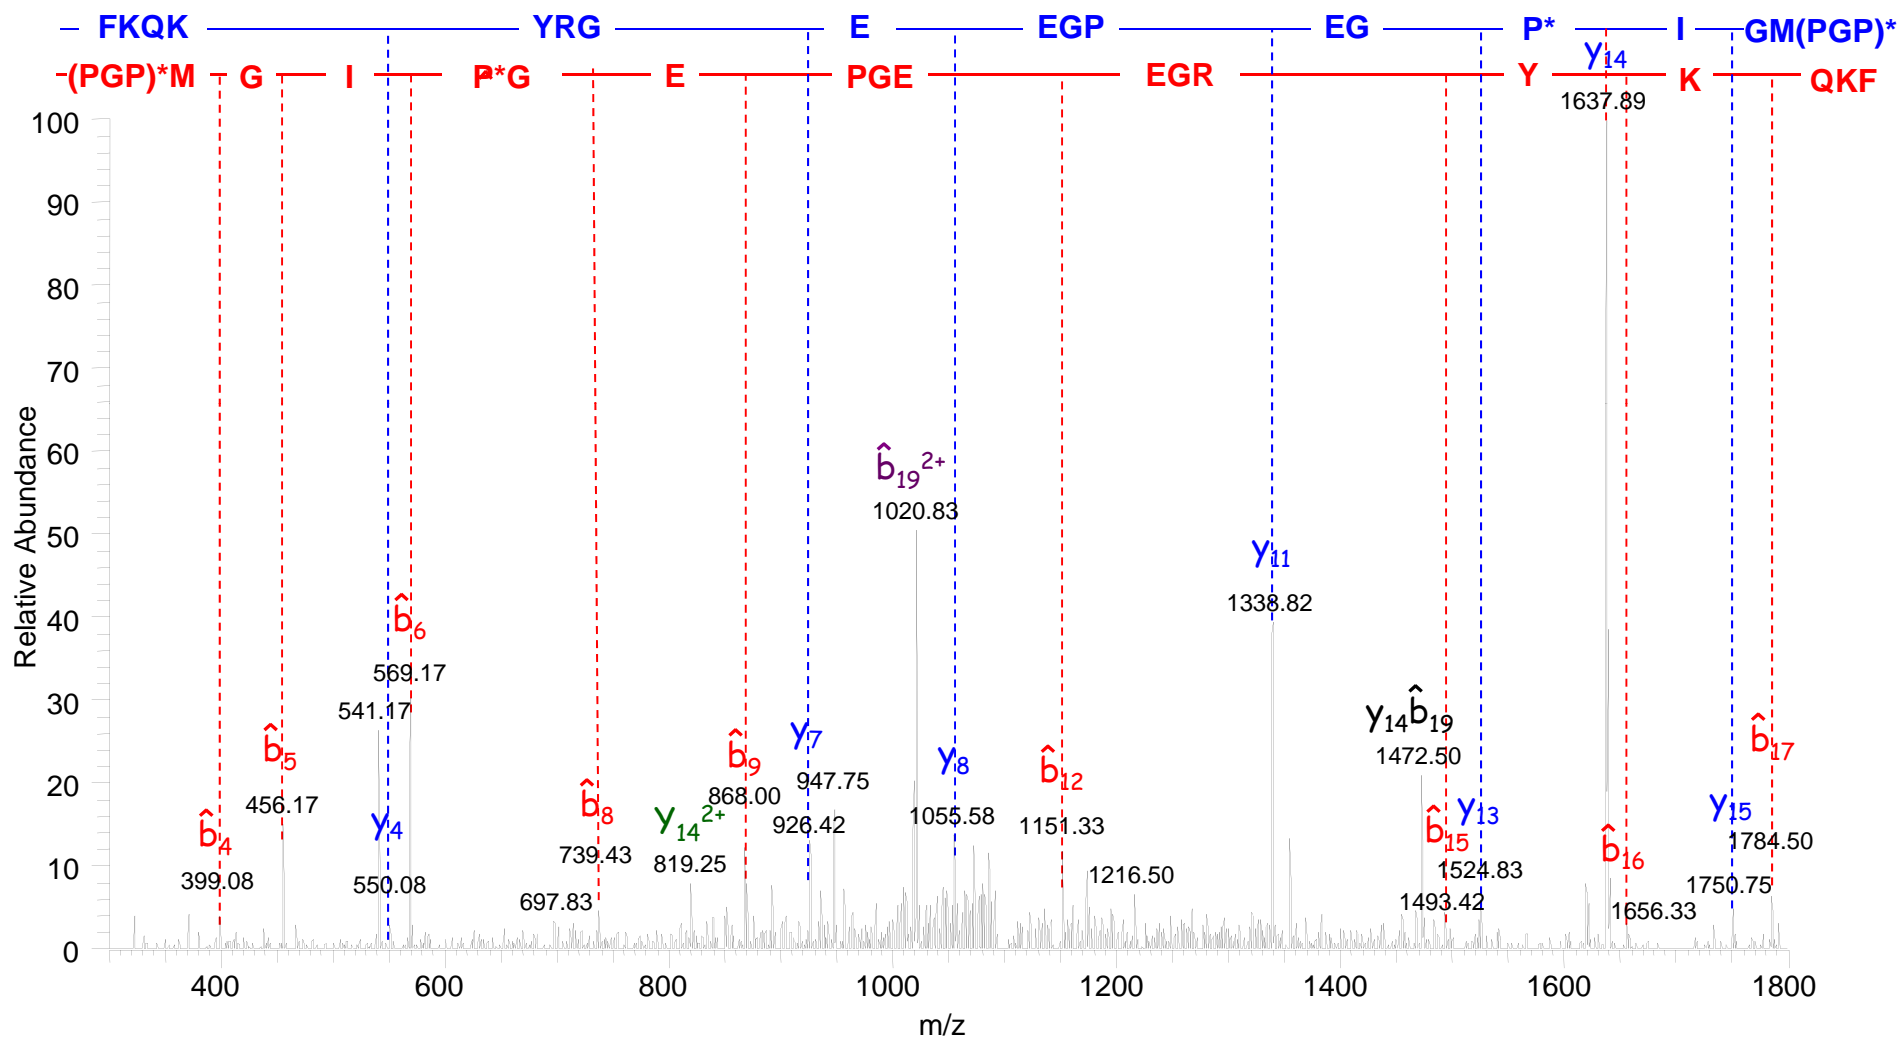

ITMS<sup>3</sup> of the  $y_{20}^{2+}$  ion at m/z 1103.5312 (2+), produced by FTMS<sup>2</sup> analysis of m/z 1256.71 (8+) (CLR-C, 1-90)

(PGP)\*MGIP\*GEPGEEGRYKQKF

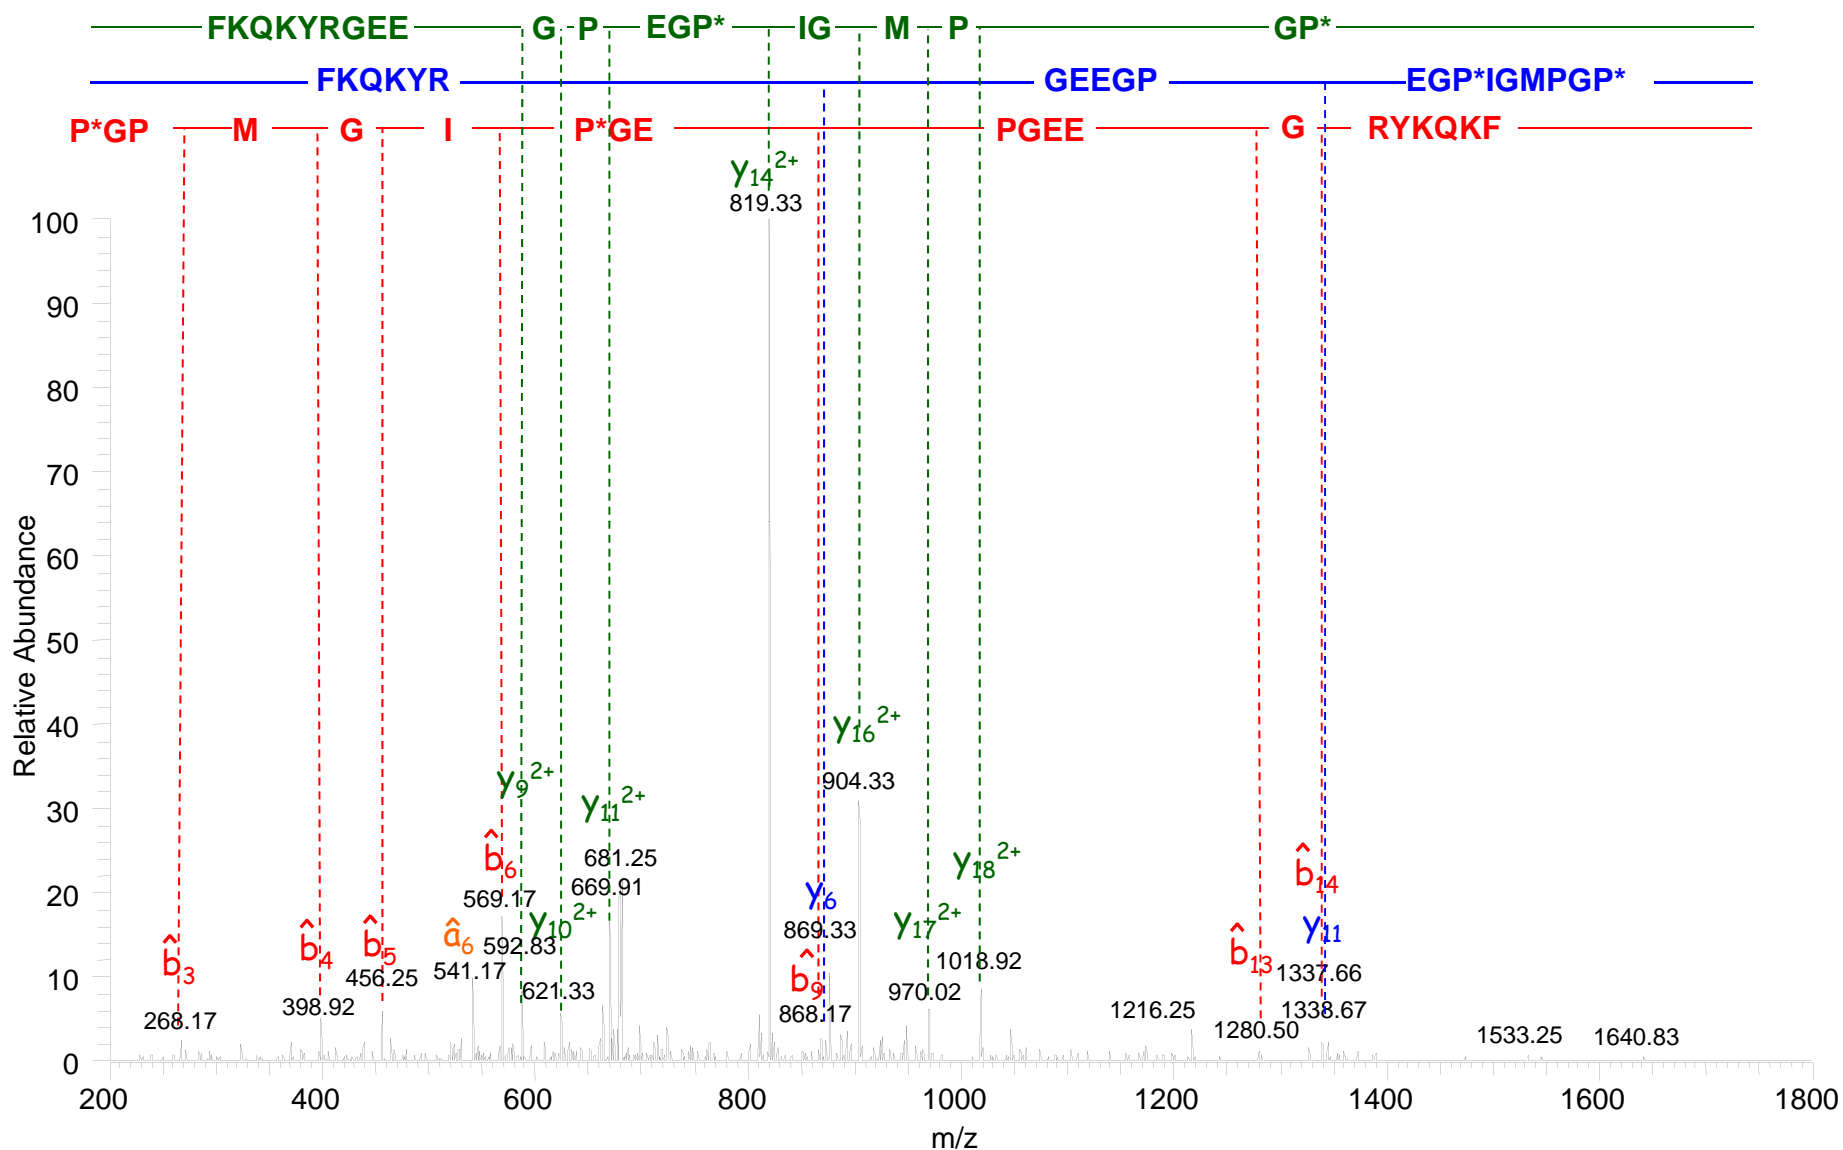

ITMS<sup>3</sup> of the  $y_{20}^{3+}$  ion at m/z 736.0229 (3+), produced by FTMS<sup>2</sup> analysis of m/z 1256.71 (8+) (CLR-C, 1-90)

P\*GPMGIP\*GEPGEEGRYKQKF



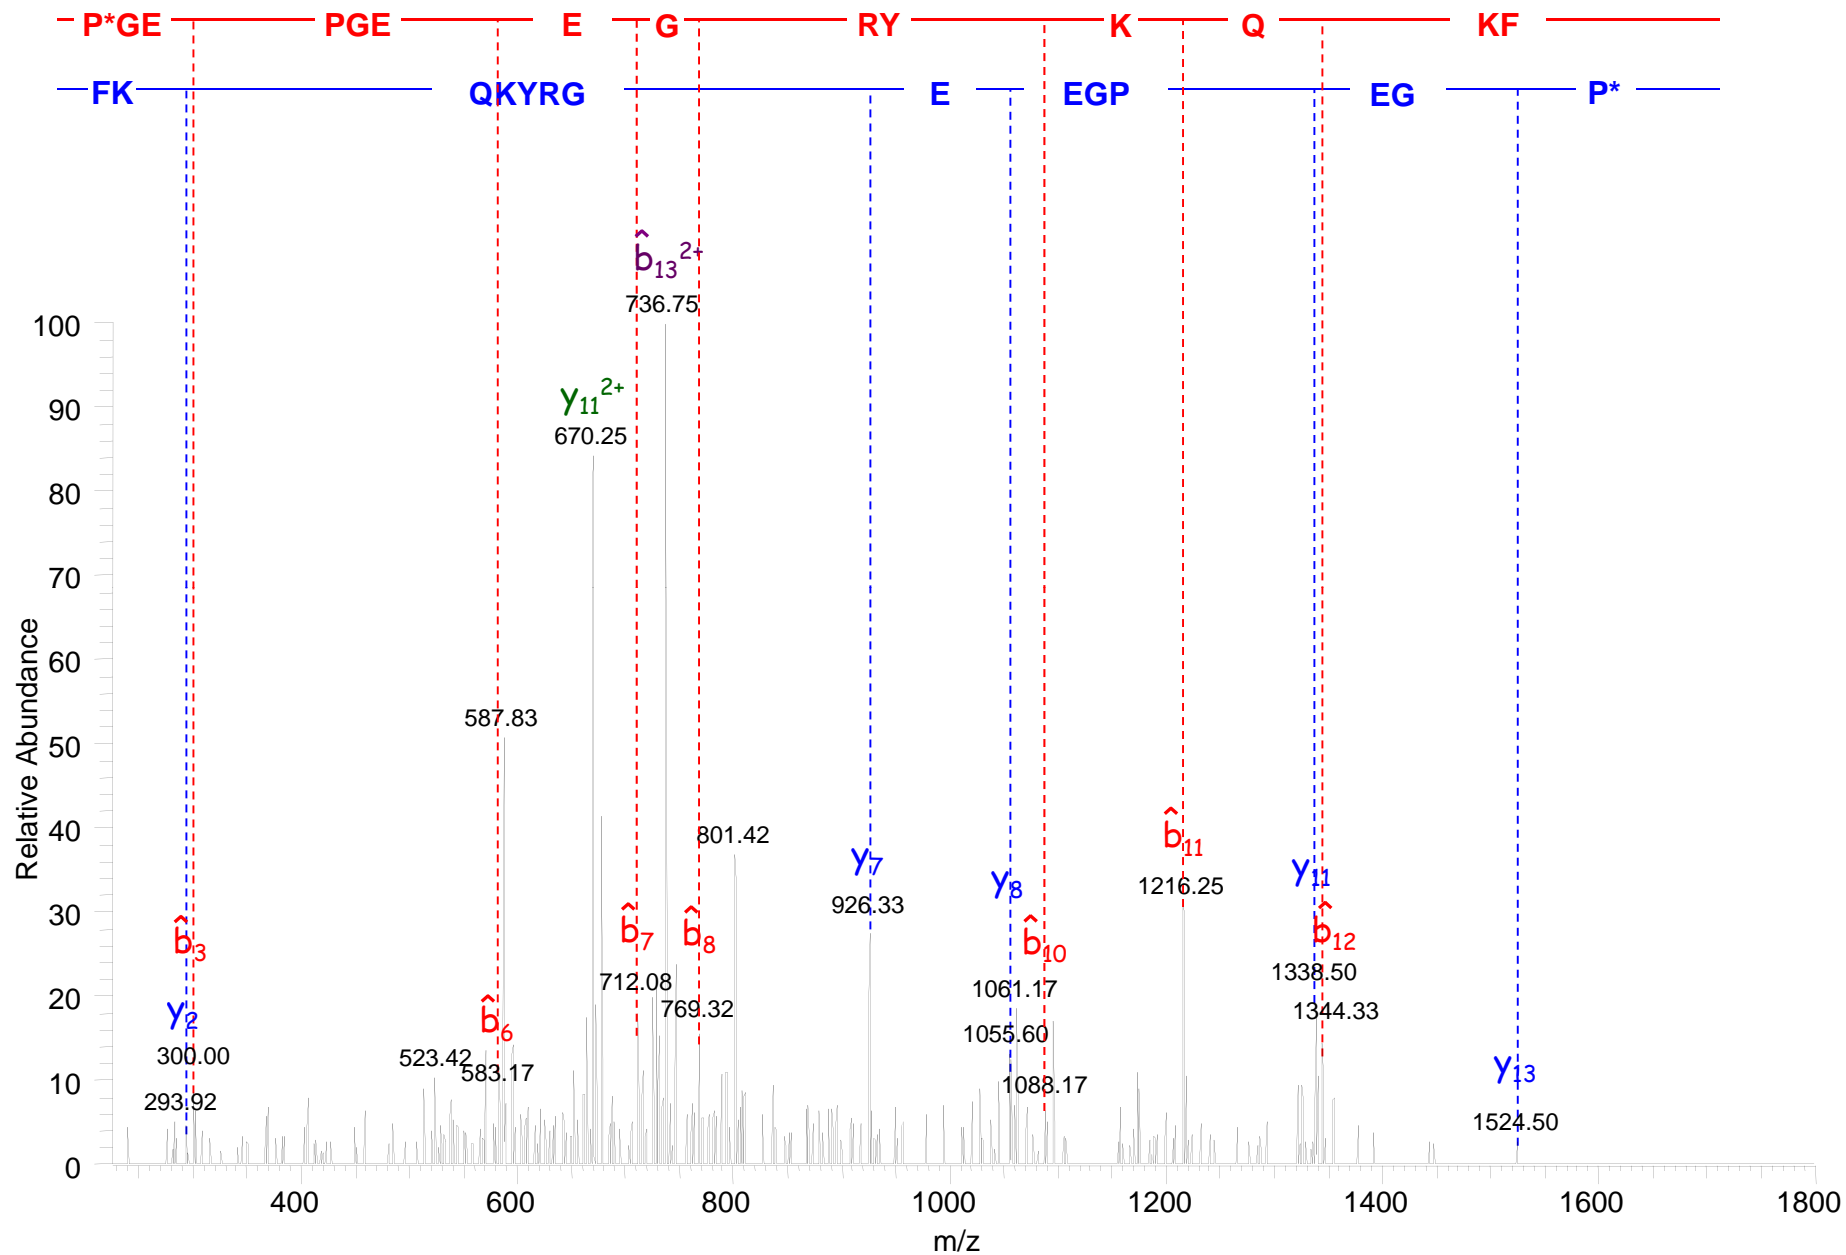

ITMS<sup>3</sup> of the y<sub>14</sub><sup>2+</sup> ion at m/z 819.3975 (2+), produced by FTMS<sup>2</sup> analysis of m/z 1256.71 (8+) (CLR-C, 1-90)

P\*GEPGEEGRYKQKF

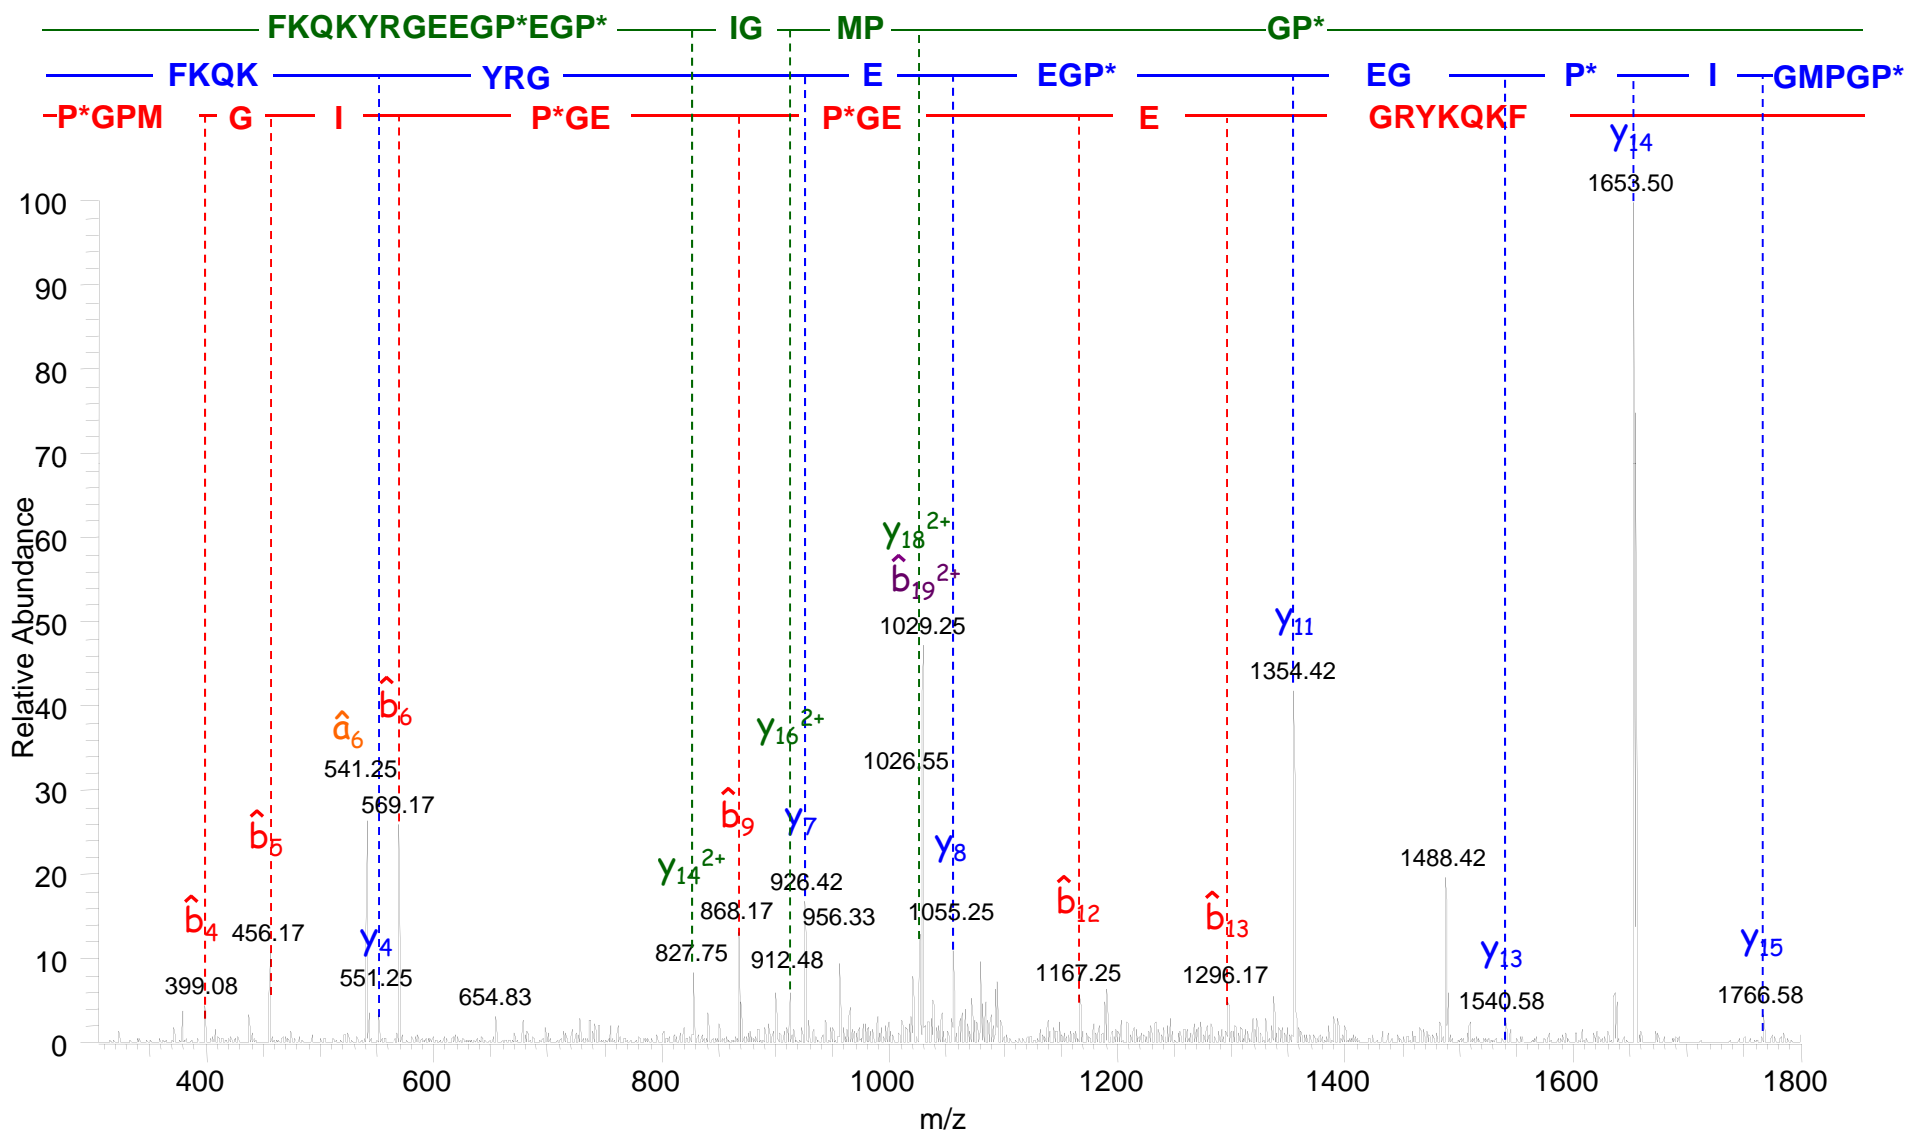

ITMS<sup>3</sup> of the  $y_{20}^{2+}$  ion at m/z 1111.5269 (2+), produced by FTMS<sup>2</sup> analysis of m/z 1258.71 (8+) (CLR-C, 1-90)

P\*GPMGIP\*GEP\*GEEGRYKQKF

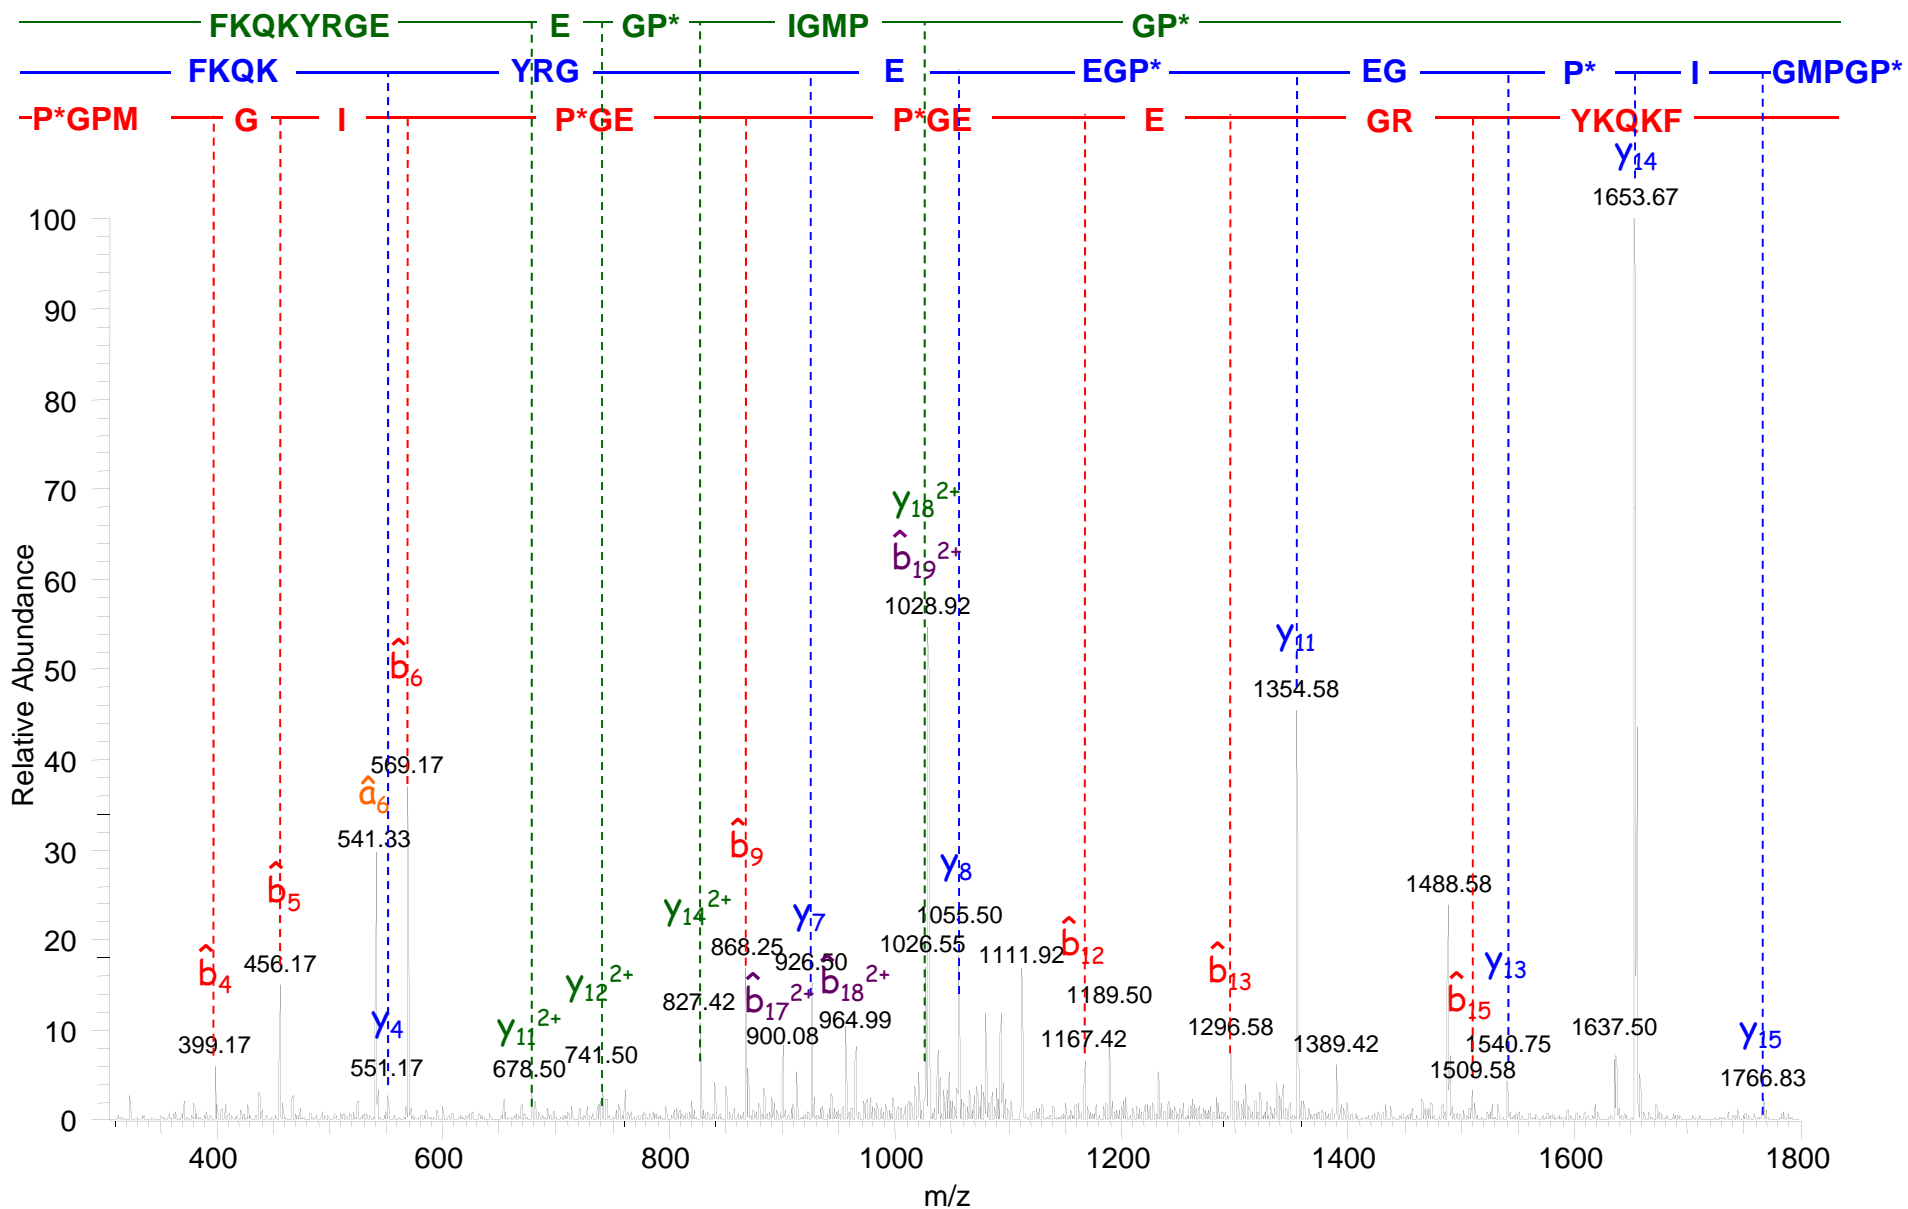

ITMS<sup>3</sup> of the y<sub>20</sub><sup>3+</sup> ion at m/z 741.3538 (3+), produced by FTMS<sup>2</sup> analysis of m/z 1258.71 (8+) (CLR-C, 1-90)

P\*GPMGIP\*GEP\*GEEGRYKQKF

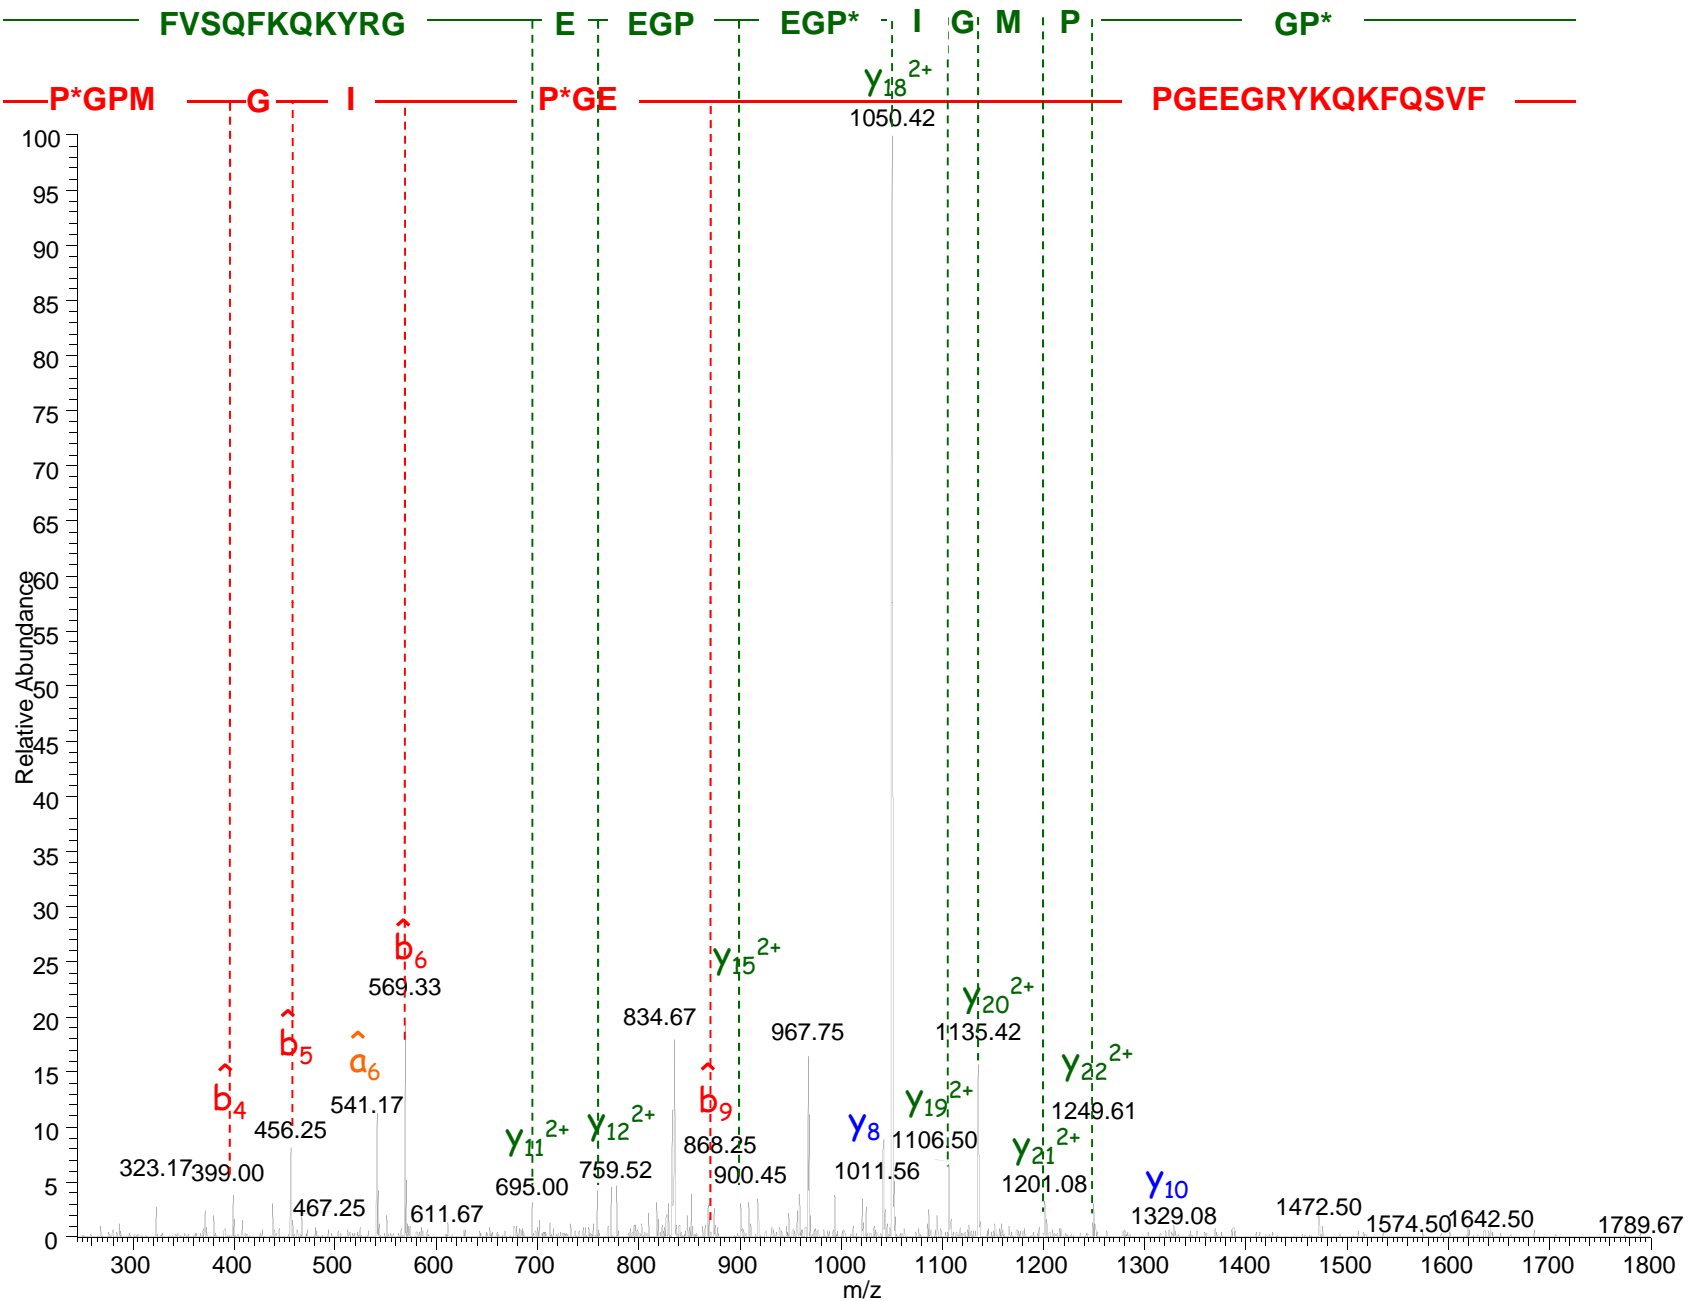

ITMS<sup>3</sup> of the  $y_{24}^{3+}$  ion at m/z 889.7638 (3+), produced by FTMS<sup>2</sup> analysis of m/z 1314.23 (8+) (CLR-C, 1-94)

**P\*GPMGIP\*GEPGEEGRYKQKFQSVF**

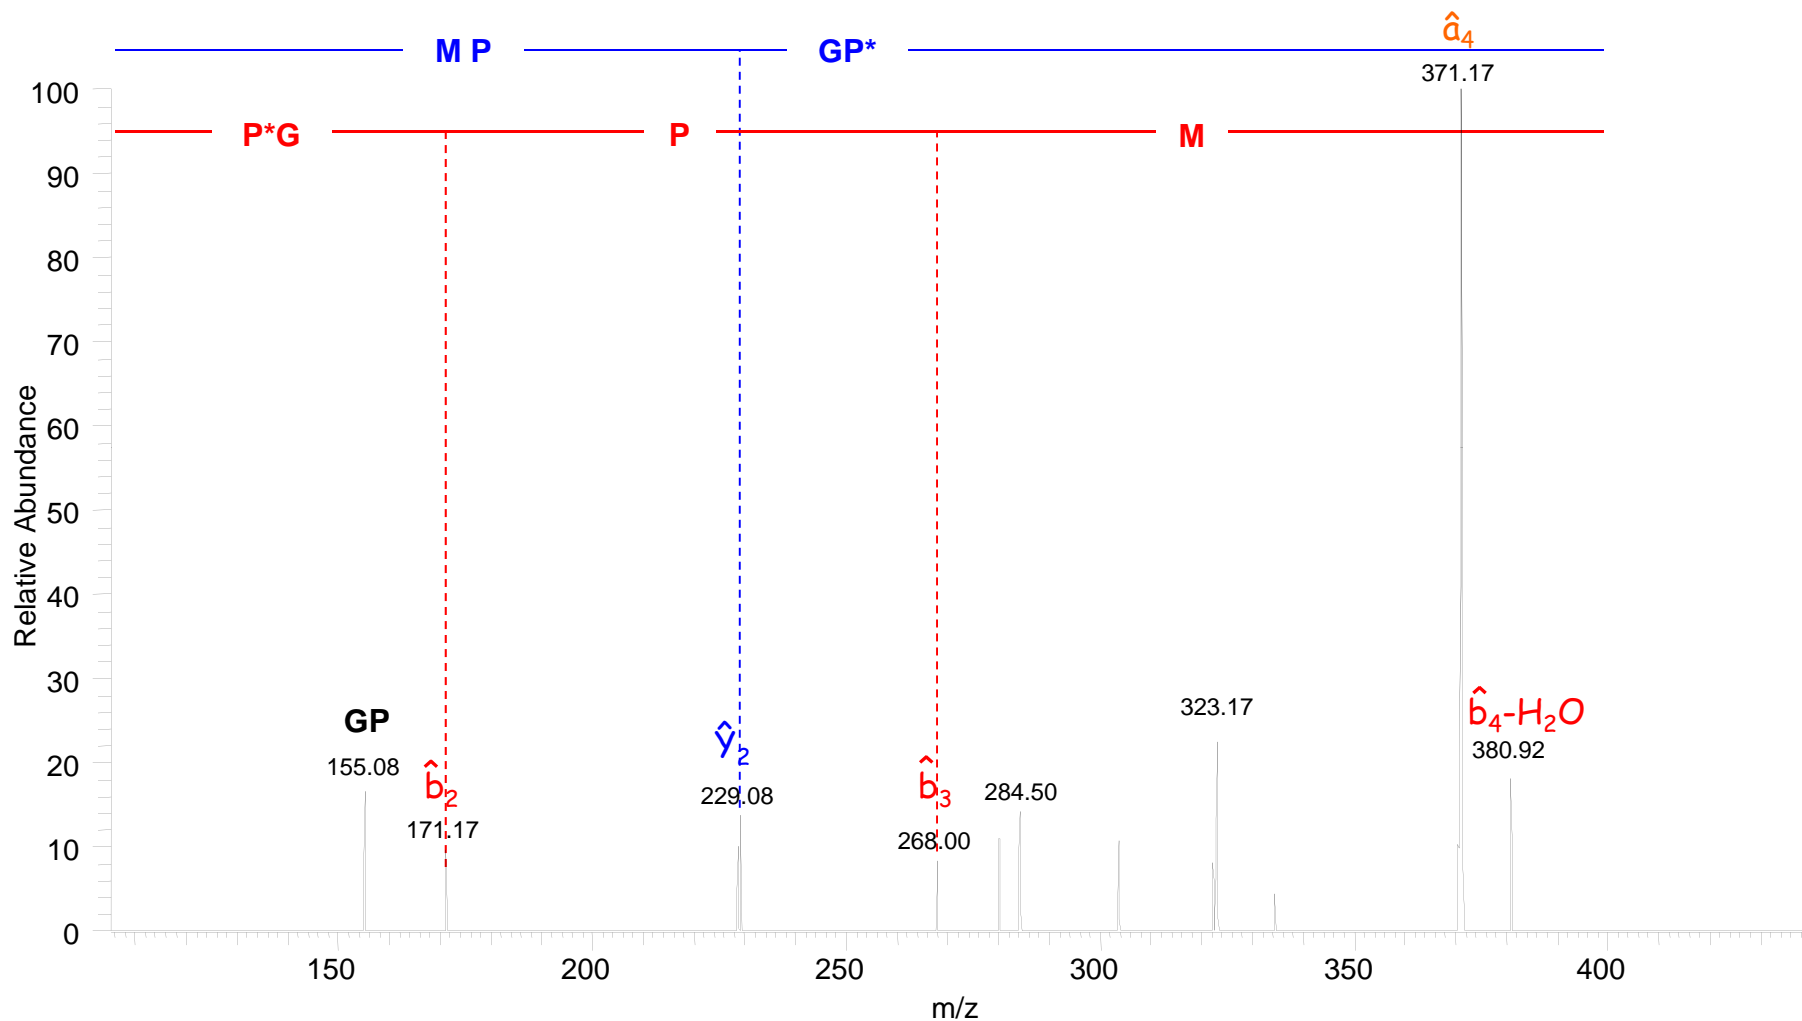

ITMS<sup>4</sup> of the fragment at m/z 399.17 (1+), produced by ITMS<sup>3</sup> analysis of m/z 889.7638 (3+) (CLR-C, 1-94)

This ion corresponds to fragment  $b_4$  produced from sequence P\*GPMGIP\*GEP\*GEEGRYKQKFQSVF.

P\*GPM

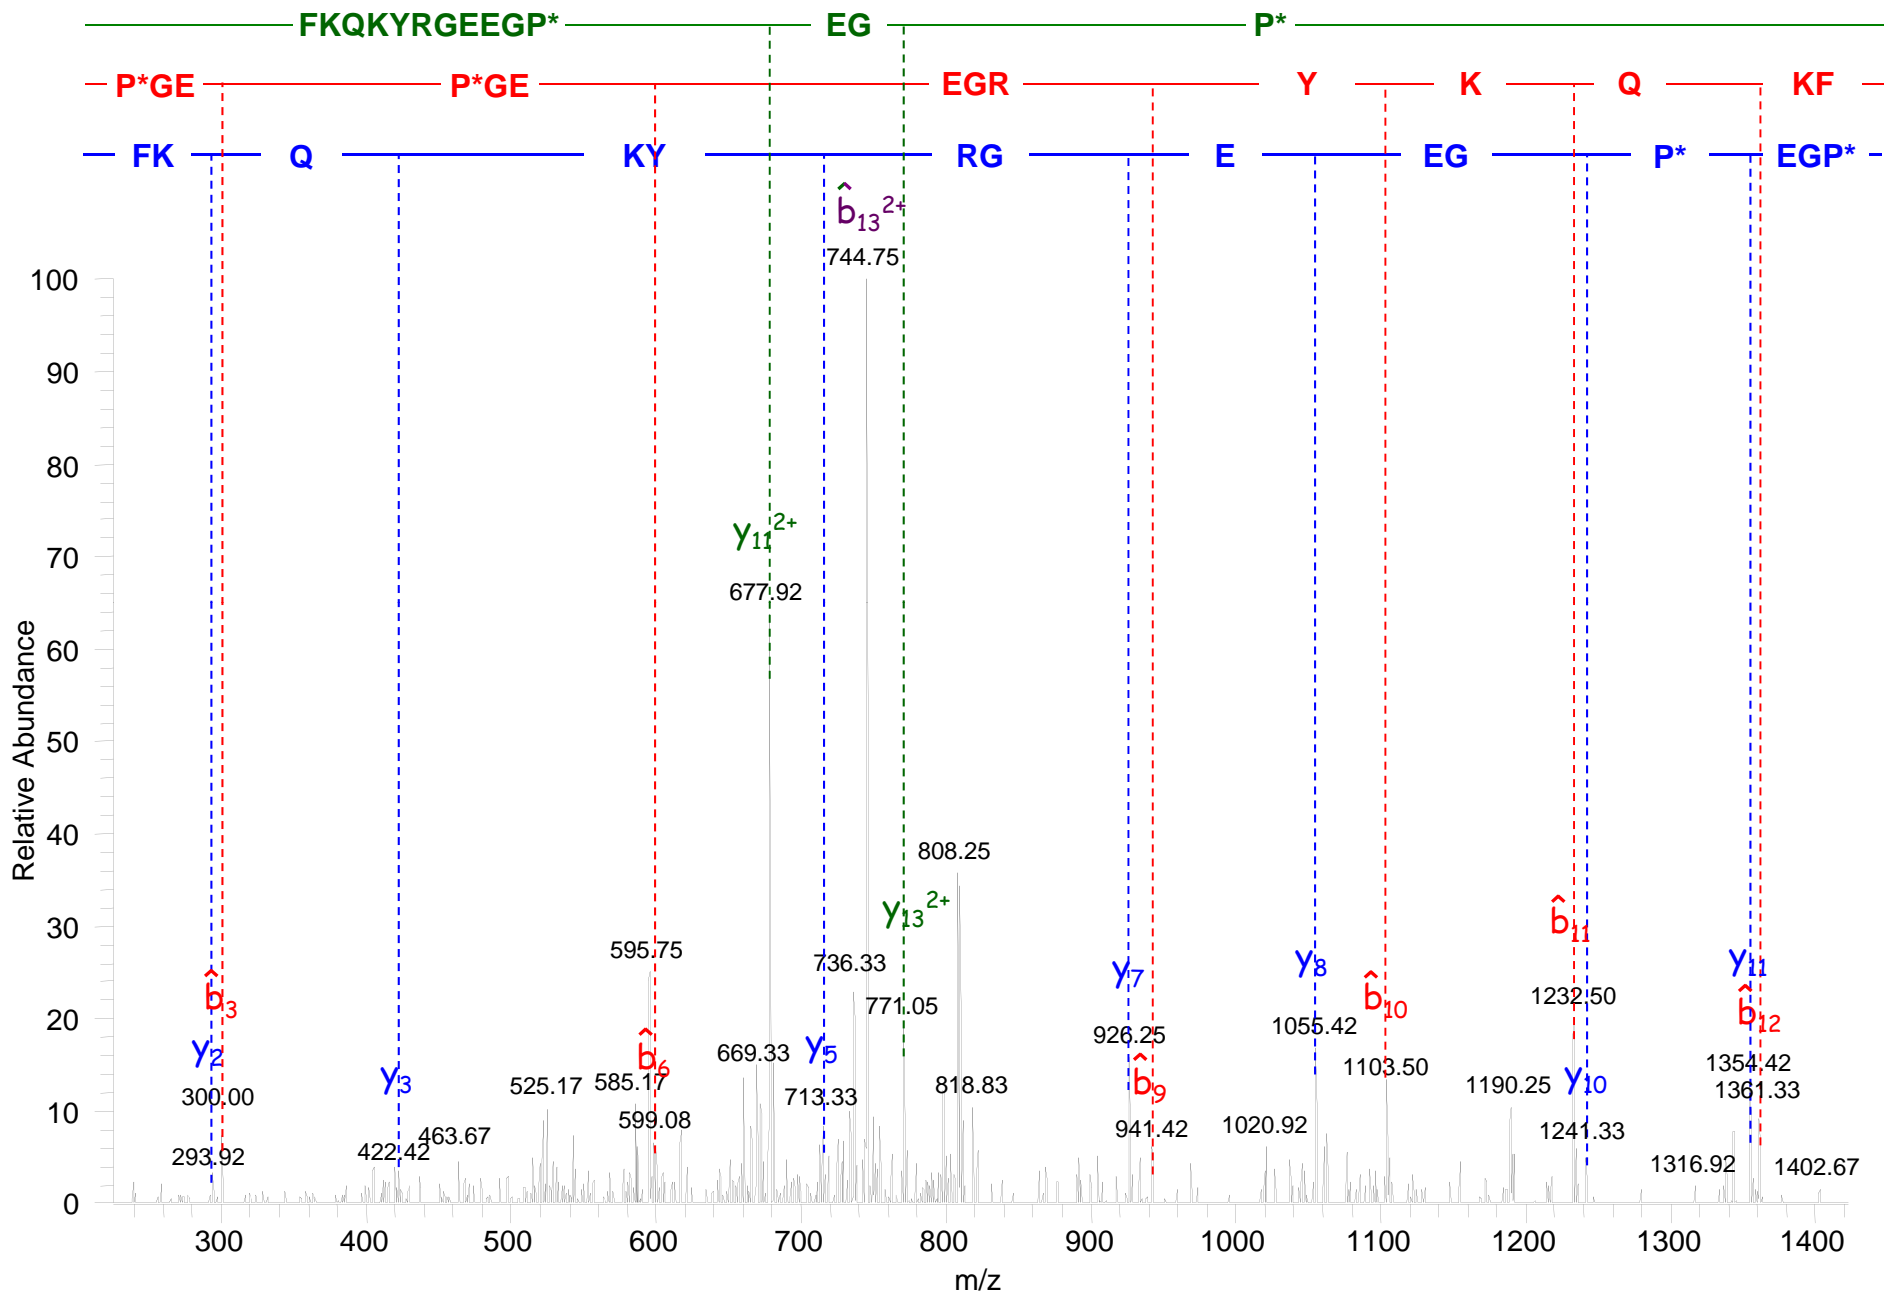

ITMS<sup>3</sup> of the  $y_{14}^{2+}$  ion at m/z 827.3938 (2+), produced by FTMS<sup>2</sup> analysis of m/z 1258.71 (8+) (CLR-C, 1-90)

P\*GEP\*GEEGRYKQK

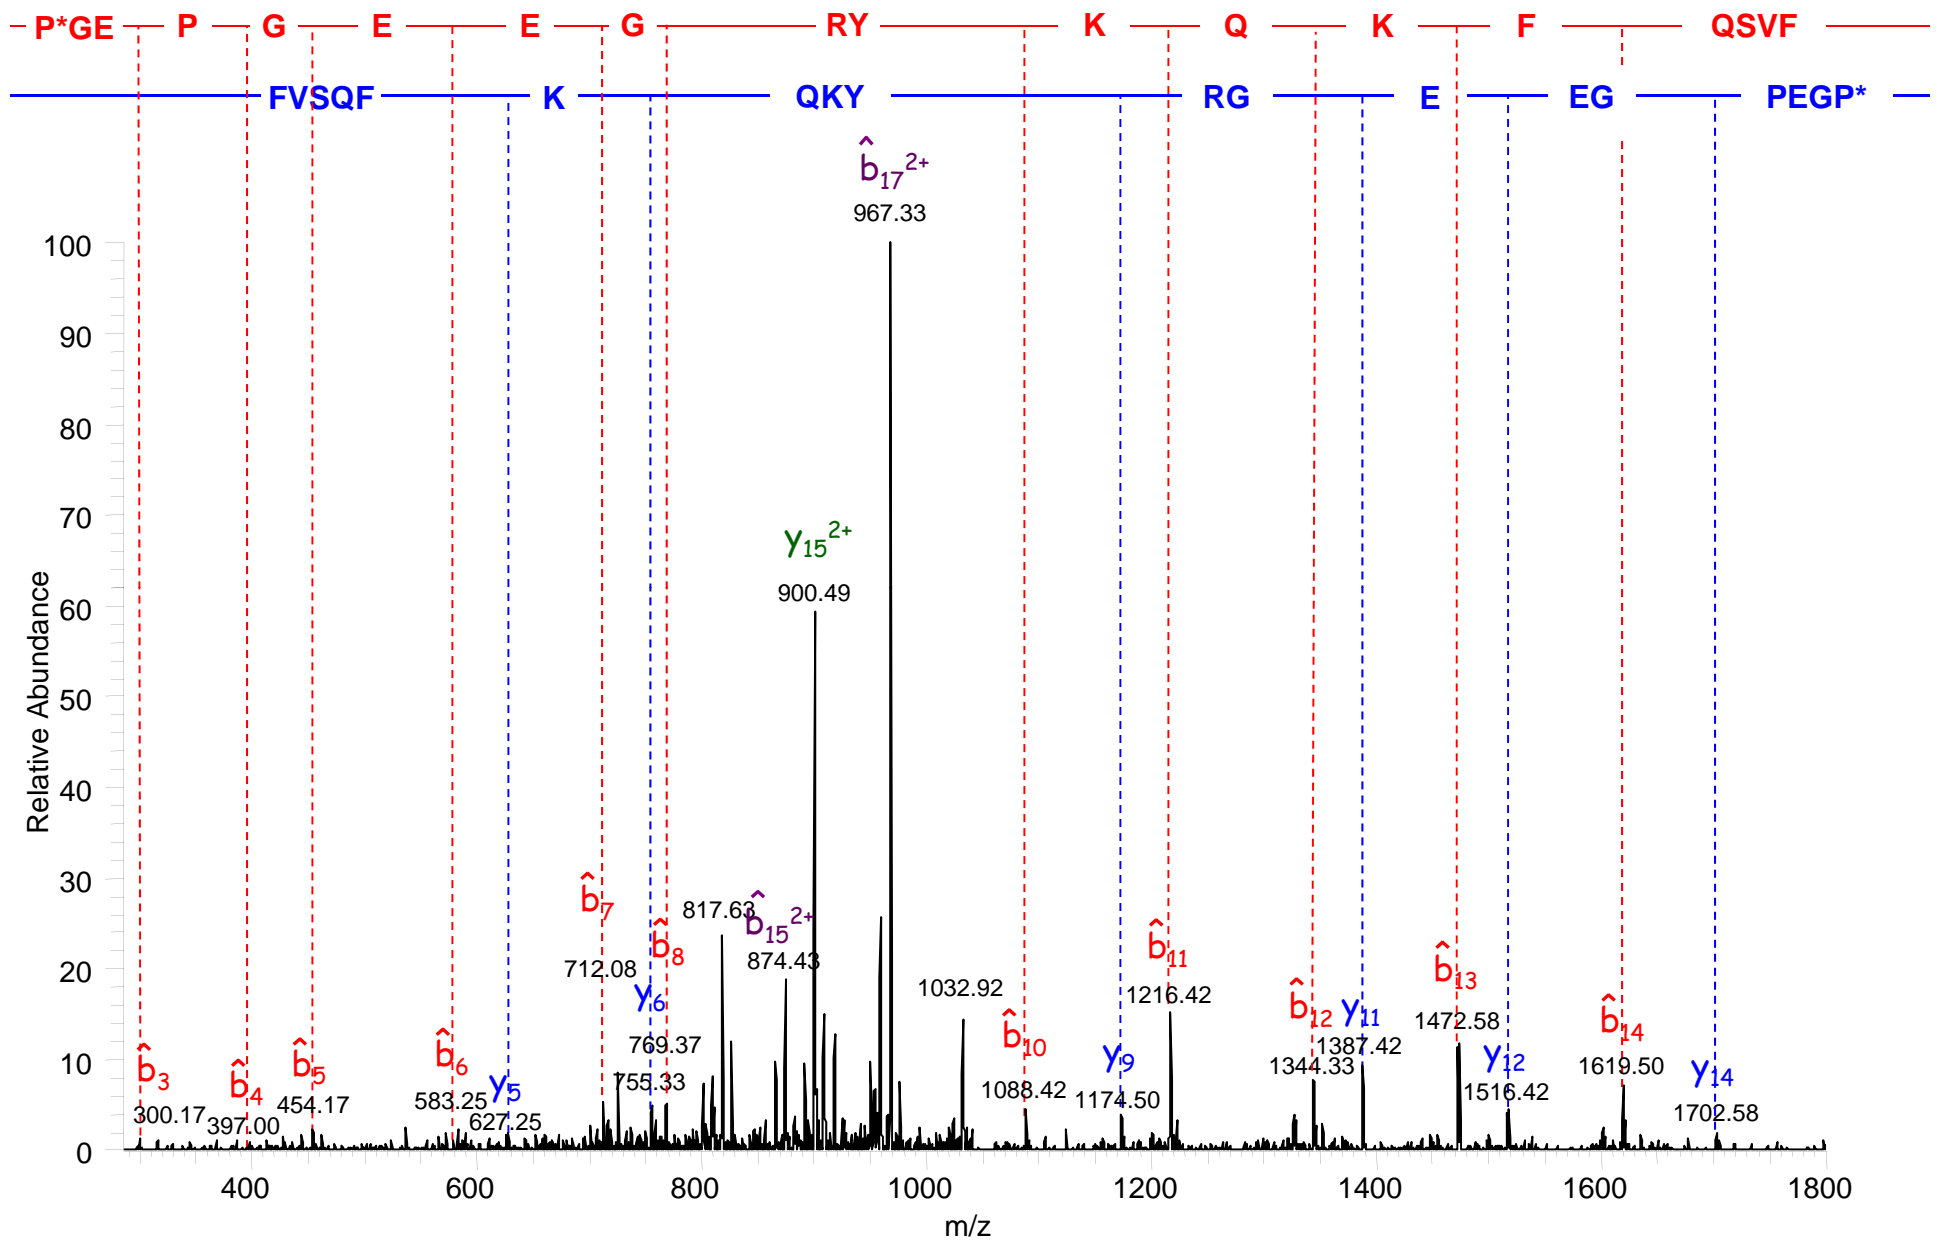

ITMS<sup>3</sup> of the  $\gamma_{18}^{2+}$  ion at m/z 1050.0091 (2+), produced by FTMS<sup>2</sup> analysis of m/z 1314.36 (8+) (CLR-C, 1-94)

P\*GEPGEEGRYKQKFKQSVF

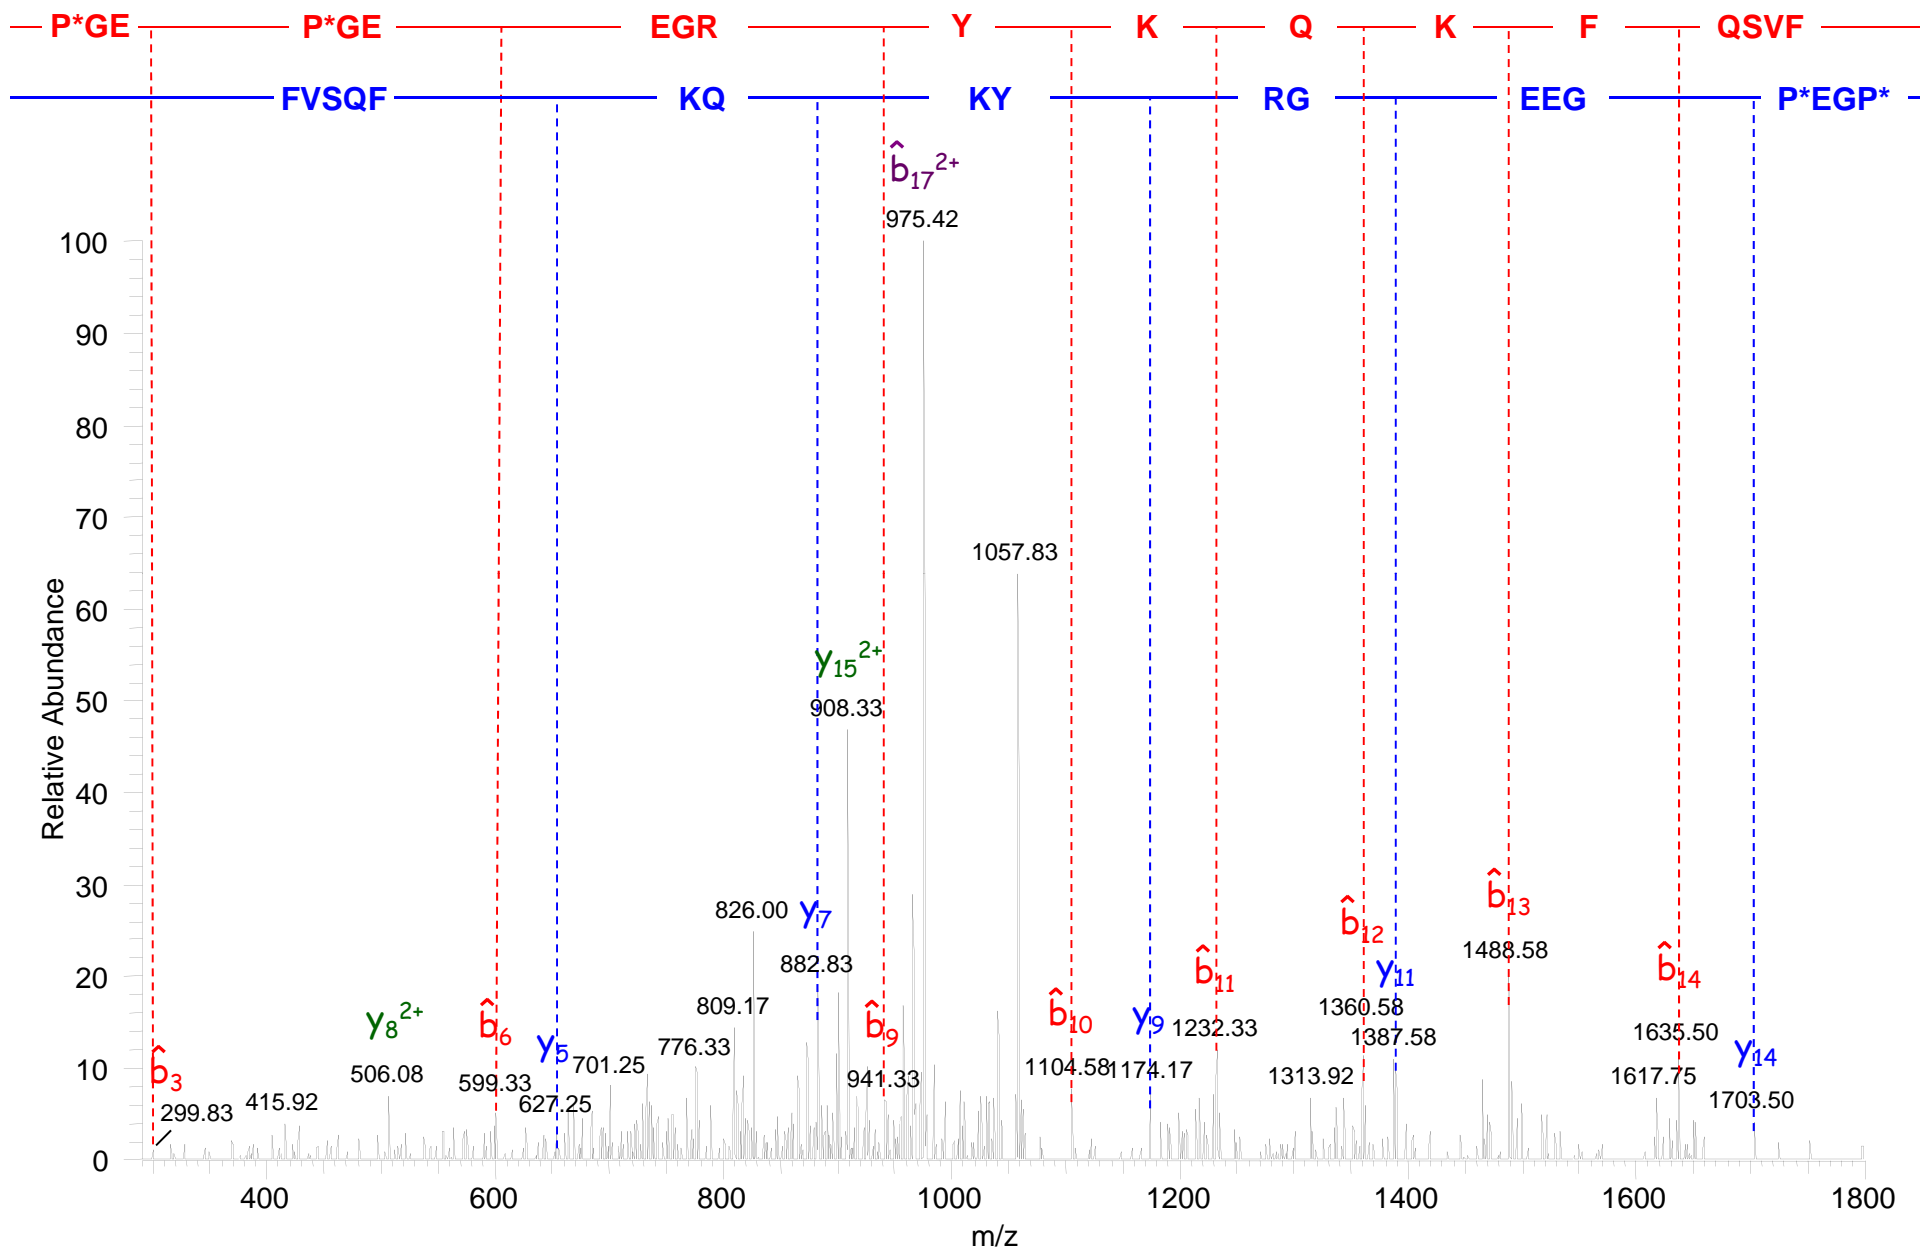

ITMS<sup>3</sup> of the  $\gamma_{18}^{2+}$  ion at m/z 1058.0063 (2+), produced by FTMS<sup>2</sup> analysis of m/z 1316.38 (8+) (CLR-C, 1-94)

P\*GEP\*GEEGRYKQKFQSVF



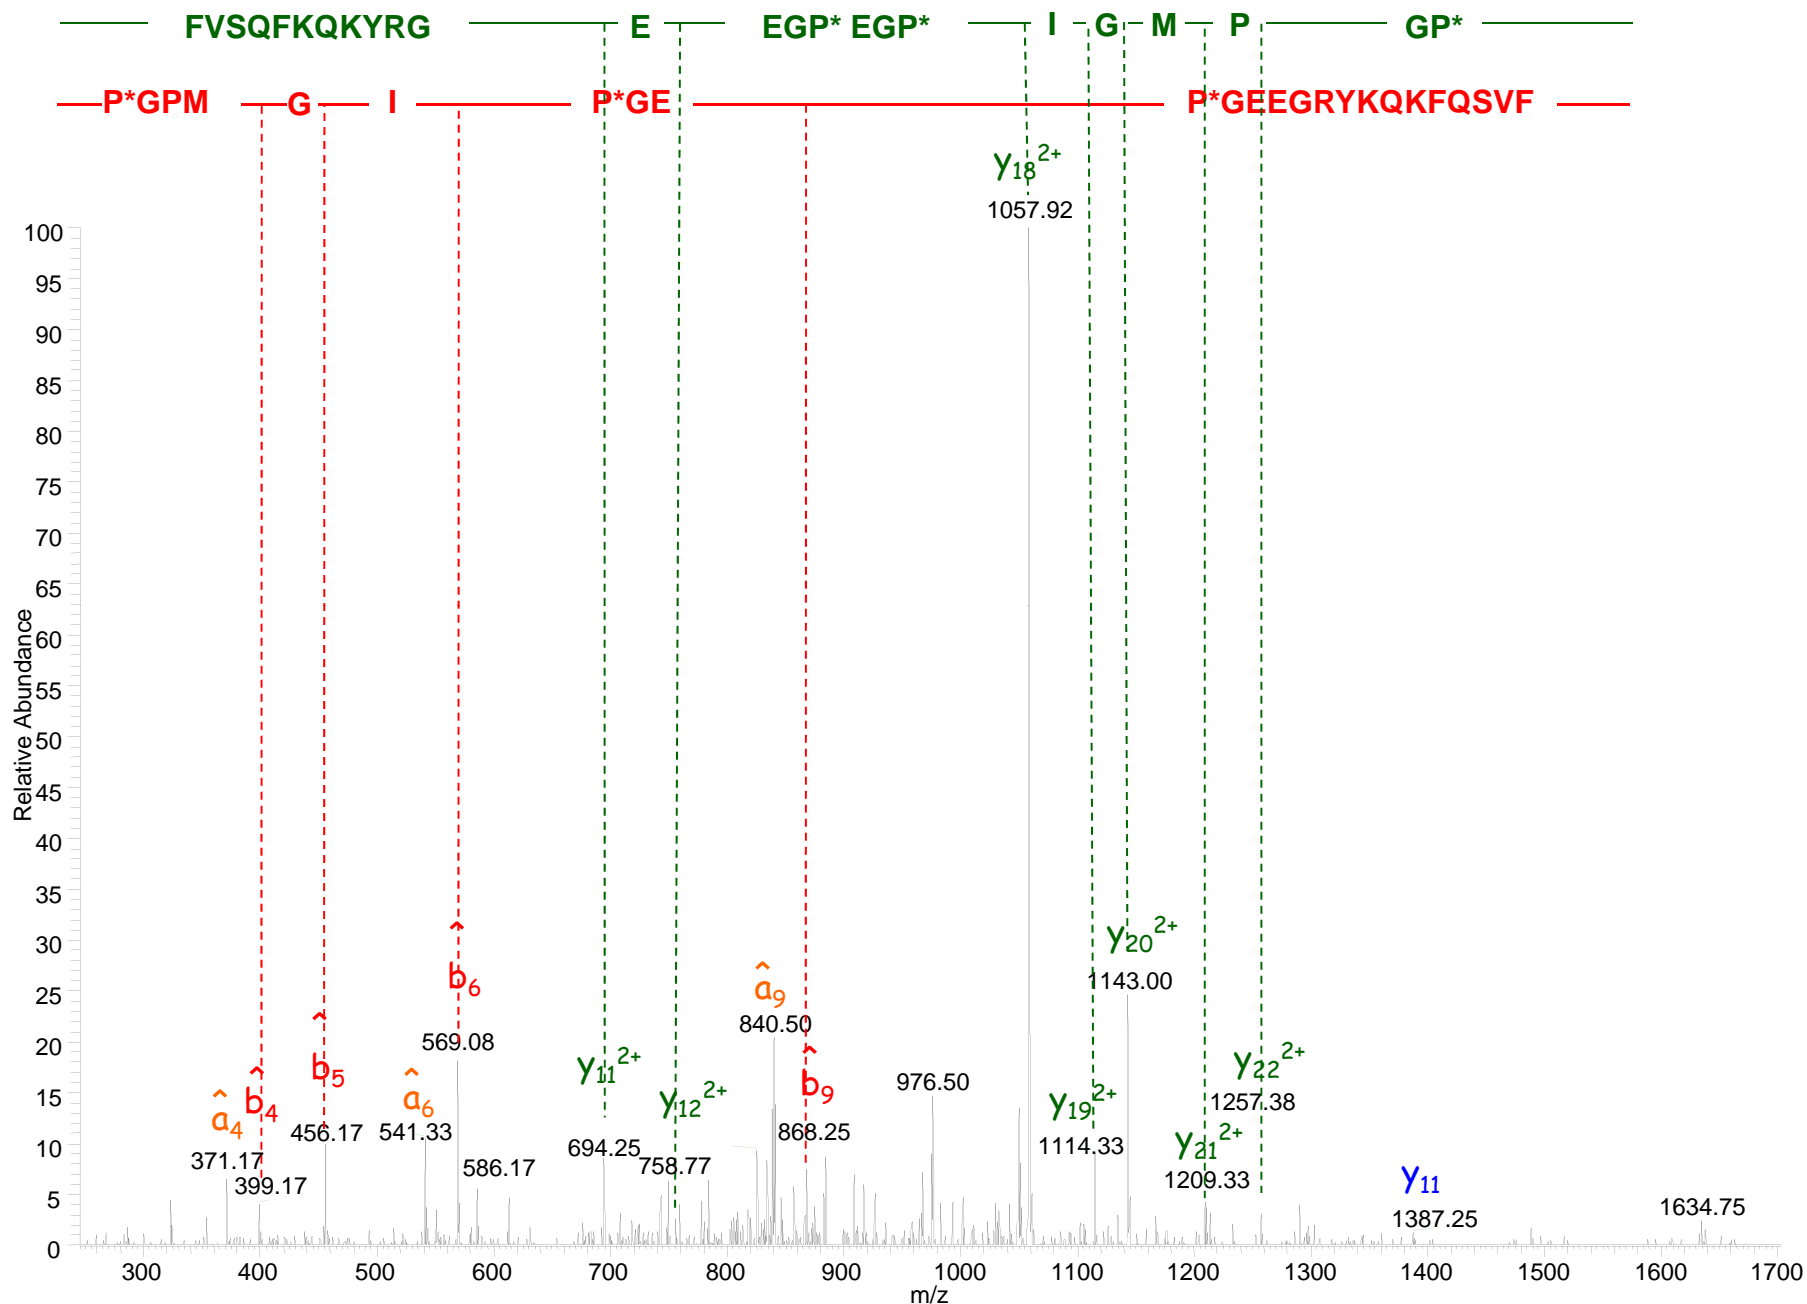

ITMS<sup>3</sup> of the  $y_{24}^{3+}$  ion at m/z 895.0957 (3+), produced by FTMS<sup>2</sup> analysis of m/z 1316.38 (8+) (CLR-C, 1-94)

**P\*GPMGIP\*GEP\*GEEGRYKQKFQSVF**

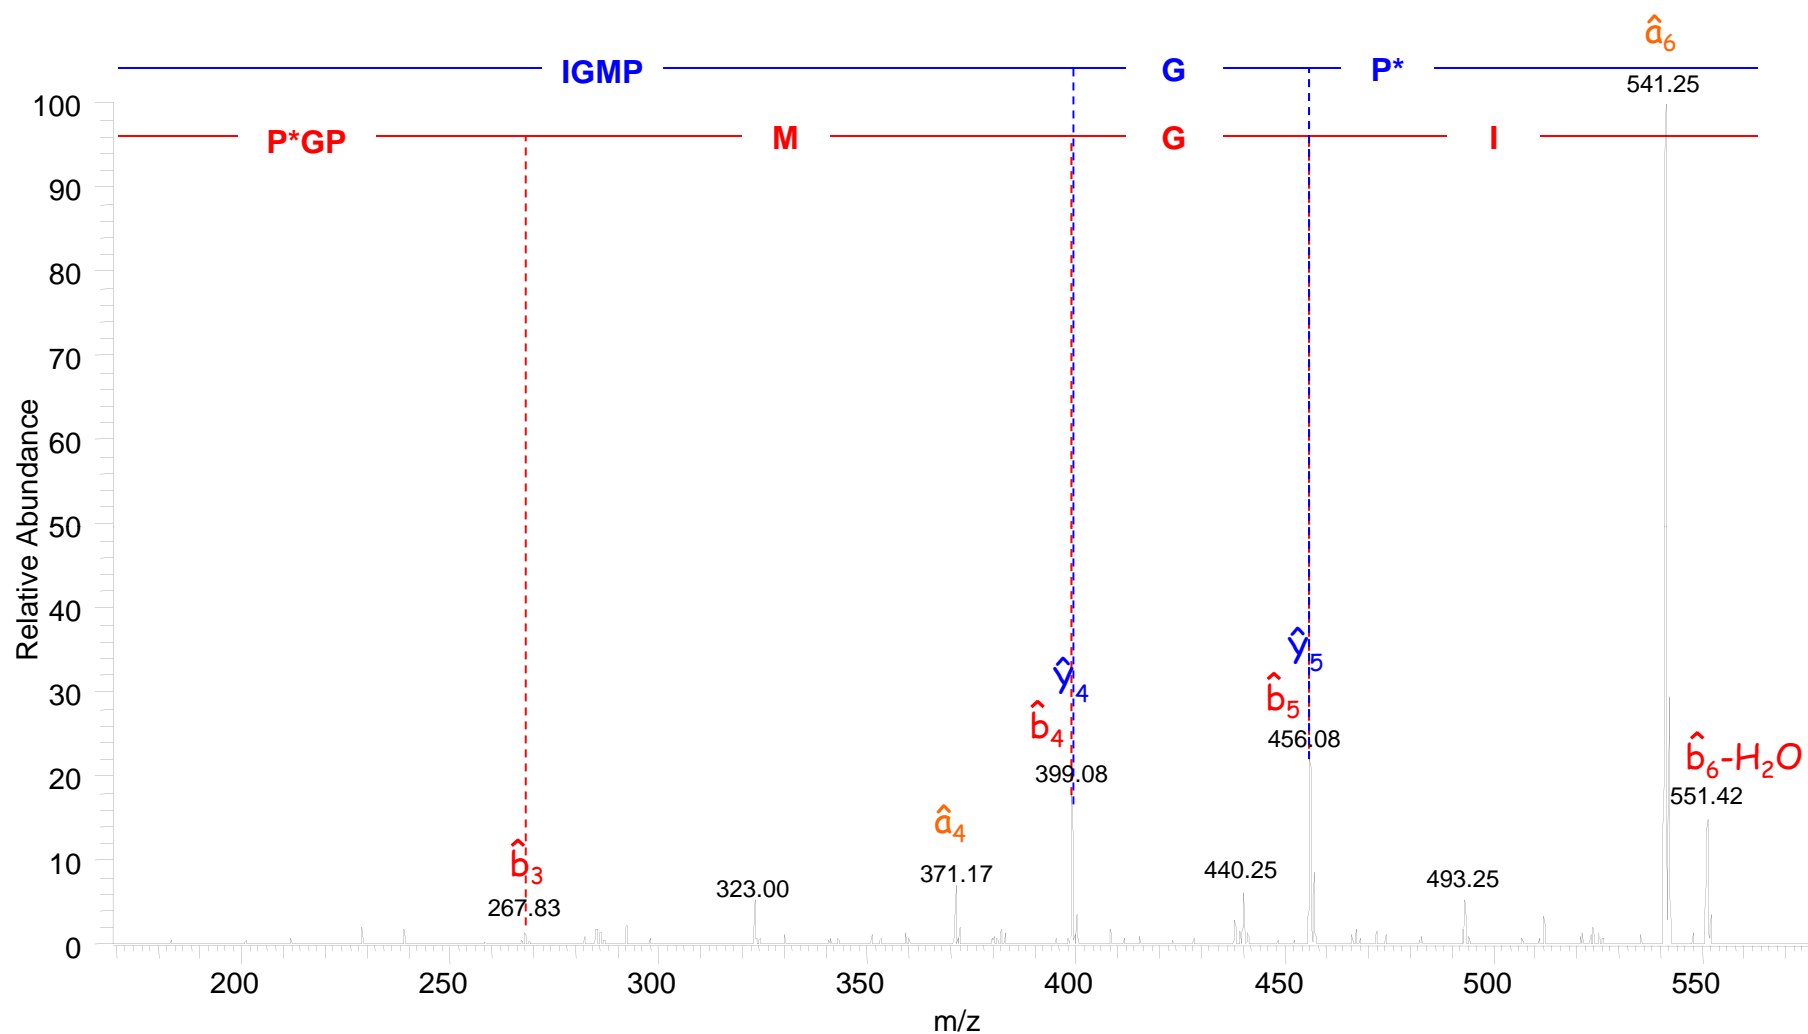

ITMS<sup>4</sup> of m/z 569.33 (1+), produced by ITMS<sup>3</sup> analysis of m/z 895.0957 (3+) (CLR-C, 1-94)

This ion corresponds to fragment  $\hat{b}_6$  produced from sequence P\*GPMGIP\*GEP\*GEEGRYKQKFQSVF

P\*GPMGI
